# Supplementary material
Source: PubMed Central journal article supplement (PMC3742913)
Supplement: tableS1.pdf [file tableS1.pdf]

KELLY et al SUPPLEMENTAL TABLE 1--QUALITY CONTROL

| Sample                              | 1          |     | 2          |     | 3          |     | 4          |     | 5          |     | 6          |     |
|-------------------------------------|------------|-----|------------|-----|------------|-----|------------|-----|------------|-----|------------|-----|
| Total reads                         | 37,202,593 |     | 37,832,159 |     | 34,777,043 |     | 31,716,744 |     | 41,410,348 |     | 36,922,315 |     |
| Passed QC                           | 26,925,536 | 72% | 27,642,390 | 73% | 26,184,949 | 75% | 22,255,913 | 70% | 30,609,194 | 74% | 27,765,769 | 75% |
| Passed rRNA filter<br>(rRNA filter) | 26,272,572 | 98% | 27,123,807 | 98% | 25,716,473 | 98% | 21,567,057 | 97% | 29,490,166 | 96% | 27,265,276 | 98% |
|                                     | 652,964    | 2%  | 518,583    | 2%  | 468,476    | 2%  | 688,856    | 3%  | 1,119,028  | 4%  | 500,493    | 2%  |
| Mapped                              | 21,764,456 | 83% | 22,094,938 | 81% | 21,309,861 | 83% | 17,336,357 | 80% | 24,099,580 | 82% | 22,526,495 | 83% |
| Unmapped                            | 4,508,116  | 17% | 5,028,869  | 19% | 4,406,612  | 17% | 4,230,700  | 20% | 5,390,586  | 18% | 4,738,781  | 17% |

Post-mapping filtering

| Passed filter  | 19,384,877 |     | 19,871,209 |     | 18,977,522 |     | 15,528,361 |     | 21,358,883 |     | 20,209,943 |     |
|----------------|------------|-----|------------|-----|------------|-----|------------|-----|------------|-----|------------|-----|
| exon           | 4,371,735  | 23% | 4,468,199  | 22% | 3,835,422  | 20% | 3,538,444  | 23% | 4,112,242  | 19% | 4,153,350  | 21% |
| exon-rev       | 31,450     | 0%  | 36,543     | 0%  | 35,648     | 0%  | 23,970     | 0%  | 32,438     | 0%  | 37,037     | 0%  |
| intergenic     | 6,499,807  | 34% | 6,699,166  | 34% | 6,116,940  | 32% | 5,642,416  | 36% | 7,507,139  | 35% | 6,485,096  | 32% |
| intron         | 3,701,179  | 19% | 4,390,808  | 22% | 4,452,227  | 23% | 2,935,903  | 19% | 4,664,771  | 22% | 4,762,882  | 24% |
| intron-rev     | 268,287    | 1%  | 262,916    | 1%  | 246,325    | 1%  | 237,429    | 2%  | 309,301    | 1%  | 271,521    | 1%  |
| junction       | 975,982    | 5%  | 998,220    | 5%  | 843,767    | 4%  | 799,025    | 5%  | 901,825    | 4%  | 923,415    | 5%  |
| mitochondrial  | 3,378,433  | 17% | 2,832,615  | 14% | 3,258,921  | 17% | 2,210,309  | 14% | 3,651,154  | 17% | 3,399,559  | 17% |
| promoter       | 85,919     | 0%  | 94,723     | 0%  | 91,226     | 0%  | 67,636     | 0%  | 87,902     | 0%  | 94,641     | 0%  |
| promoter-rev   | 72,085     | 0%  | 88,019     | 0%  | 97,046     | 1%  | 73,229     | 0%  | 92,111     | 0%  | 82,442     | 0%  |
| coding regions | 5,347,717  | 28% | 5,466,419  | 28% | 4,679,189  | 25% | 4,337,469  | 28% | 5,014,067  | 23% | 5,076,765  | 25% |

Mapping by chromosome

|       |           |     |           |     |           |     |           |     |           |     |           |     |
|-------|-----------|-----|-----------|-----|-----------|-----|-----------|-----|-----------|-----|-----------|-----|
| chr1  | 1,681,750 | 9%  | 1,837,868 | 9%  | 1,752,906 | 9%  | 1,335,388 | 9%  | 1,832,214 | 9%  | 1,836,180 | 9%  |
| chr2  | 1,187,076 | 6%  | 1,239,697 | 6%  | 1,175,206 | 6%  | 923,342   | 6%  | 1,235,804 | 6%  | 1,339,673 | 7%  |
| chr3  | 1,062,375 | 5%  | 1,163,339 | 6%  | 1,073,841 | 6%  | 839,176   | 5%  | 1,111,453 | 5%  | 1,121,484 | 6%  |
| chr4  | 869,445   | 4%  | 916,661   | 5%  | 891,486   | 5%  | 659,723   | 4%  | 931,844   | 4%  | 979,171   | 5%  |
| chr5  | 1,085,202 | 6%  | 1,169,341 | 6%  | 1,052,918 | 6%  | 908,196   | 6%  | 1,191,703 | 6%  | 1,218,290 | 6%  |
| chr6  | 642,229   | 3%  | 696,967   | 4%  | 690,021   | 4%  | 505,397   | 3%  | 699,061   | 3%  | 704,722   | 3%  |
| chr7  | 921,055   | 5%  | 1,033,387 | 5%  | 914,355   | 5%  | 812,483   | 5%  | 1,119,674 | 5%  | 962,104   | 5%  |
| chr8  | 891,277   | 5%  | 972,427   | 5%  | 916,420   | 5%  | 768,695   | 5%  | 979,365   | 5%  | 975,167   | 5%  |
| chr9  | 717,933   | 4%  | 755,516   | 4%  | 727,122   | 4%  | 524,401   | 3%  | 741,916   | 3%  | 795,996   | 4%  |
| chrM  | 3,378,433 | 17% | 2,832,615 | 14% | 3,258,921 | 17% | 2,210,309 | 14% | 3,651,154 | 17% | 3,399,559 | 17% |
| chrX  | 389,537   | 2%  | 409,335   | 2%  | 385,627   | 2%  | 310,443   | 2%  | 421,929   | 2%  | 390,156   | 2%  |
| chr10 | 883,494   | 5%  | 997,334   | 5%  | 905,690   | 5%  | 702,753   | 5%  | 899,474   | 4%  | 942,485   | 5%  |
| chr11 | 427,160   | 2%  | 453,388   | 2%  | 440,331   | 2%  | 329,675   | 2%  | 470,028   | 2%  | 443,561   | 2%  |
| chr12 | 257,822   | 1%  | 295,000   | 1%  | 273,319   | 1%  | 208,806   | 1%  | 268,466   | 1%  | 280,146   | 1%  |
| chr13 | 474,805   | 2%  | 504,880   | 3%  | 487,461   | 3%  | 406,120   | 3%  | 530,453   | 2%  | 489,775   | 2%  |
| chr14 | 516,994   | 3%  | 560,769   | 3%  | 533,044   | 3%  | 399,353   | 3%  | 543,127   | 3%  | 545,946   | 3%  |
| chr15 | 390,518   | 2%  | 443,958   | 2%  | 417,014   | 2%  | 299,533   | 2%  | 432,141   | 2%  | 420,614   | 2%  |
| chr16 | 396,054   | 2%  | 431,301   | 2%  | 392,032   | 2%  | 346,963   | 2%  | 434,559   | 2%  | 415,372   | 2%  |
| chr17 | 456,374   | 2%  | 512,849   | 3%  | 486,653   | 3%  | 346,656   | 2%  | 501,099   | 2%  | 551,068   | 3%  |
| chr18 | 329,673   | 2%  | 369,017   | 2%  | 352,269   | 2%  | 255,849   | 2%  | 367,134   | 2%  | 359,071   | 2%  |
| chr19 | 312,264   | 2%  | 351,247   | 2%  | 327,962   | 2%  | 247,193   | 2%  | 337,474   | 2%  | 336,459   | 2%  |
| chr20 | 283,951   | 1%  | 308,666   | 2%  | 293,834   | 2%  | 225,375   | 1%  | 292,268   | 1%  | 290,823   | 1%  |
| chrUn | 1,829,456 | 9%  | 1,615,647 | 8%  | 1,229,090 | 6%  | 1,962,532 | 13% | 2,366,543 | 11% | 1,412,121 | 7%  |

| Sample                              | 7          |     | 8          |     | 9          |     | 10         |     | 11         |     | 12         |     |
|-------------------------------------|------------|-----|------------|-----|------------|-----|------------|-----|------------|-----|------------|-----|
| Total reads                         | 36,412,589 |     | 40,902,957 |     | 48,917,834 |     | 50,626,167 |     | 45,088,225 |     | 65,426,708 |     |
| Passed QC                           | 26,257,458 | 72% | 27,897,505 | 68% | 33,771,269 | 69% | 34,566,605 | 68% | 33,657,330 | 75% | 48,937,168 | 75% |
| Passed rRNA filter<br>(rRNA filter) | 25,096,980 | 96% | 27,167,531 | 97% | 33,004,915 | 98% | 33,470,367 | 97% | 32,476,489 | 96% | 47,788,221 | 98% |
|                                     | 1,160,478  | 4%  | 729,974    | 3%  | 766,354    | 2%  | 1,096,238  | 3%  | 1,180,841  | 4%  | 1,148,947  | 2%  |
| Mapped                              | 20,495,271 | 82% | 22,046,678 | 81% | 26,699,235 | 81% | 26,902,830 | 80% | 26,554,081 | 82% | 39,029,803 | 82% |
| Unmapped                            | 4,601,709  | 18% | 5,120,853  | 19% | 6,305,680  | 19% | 6,567,537  | 20% | 5,922,408  | 18% | 8,758,418  | 18% |

#### Post-mapping filtering

| Passed filter  | 18,260,155 |     | 19,505,557 |     | 24,054,543 |     | 24,087,251 |     | 23,384,087 |     | 34,550,496 |     |
|----------------|------------|-----|------------|-----|------------|-----|------------|-----|------------|-----|------------|-----|
| exon           | 3,966,822  | 22% | 4,643,953  | 24% | 5,274,072  | 22% | 5,282,290  | 22% | 4,822,345  | 21% | 7,026,662  | 20% |
| exon-rev       | 27,849     | 0%  | 29,603     | 0%  | 42,485     | 0%  | 39,966     | 0%  | 38,248     | 0%  | 62,923     | 0%  |
| intergenic     | 6,765,433  | 37% | 6,721,272  | 34% | 8,694,094  | 36% | 7,967,935  | 33% | 8,265,518  | 35% | 10,754,690 | 31% |
| intron         | 3,279,199  | 18% | 3,096,893  | 16% | 5,045,527  | 21% | 5,242,256  | 22% | 5,633,720  | 24% | 7,633,796  | 22% |
| intron-rev     | 286,555    | 2%  | 254,508    | 1%  | 342,646    | 1%  | 336,435    | 1%  | 351,380    | 2%  | 458,719    | 1%  |
| junction       | 900,421    | 5%  | 1,066,135  | 5%  | 1,206,268  | 5%  | 1,174,584  | 5%  | 533,185    | 2%  | 1,583,625  | 5%  |
| mitochondrial  | 2,876,626  | 16% | 3,516,307  | 18% | 3,226,256  | 13% | 3,792,933  | 16% | 3,518,271  | 15% | 6,697,283  | 19% |
| promoter       | 76,839     | 0%  | 79,013     | 0%  | 107,593    | 0%  | 111,702    | 0%  | 106,453    | 0%  | 159,529    | 0%  |
| promoter-rev   | 80,411     | 0%  | 97,873     | 1%  | 115,602    | 0%  | 139,150    | 1%  | 114,967    | 0%  | 173,269    | 1%  |
| coding regions | 4,867,243  | 27% | 5,710,088  | 29% | 6,480,340  | 27% | 6,456,874  | 27% | 5,355,530  | 23% | 8,610,287  | 25% |

#### Mapping by chromosome

|       |           |     |           |     |           |     |           |     |           |     |           |     |
|-------|-----------|-----|-----------|-----|-----------|-----|-----------|-----|-----------|-----|-----------|-----|
| chr1  | 1,498,493 | 8%  | 1,557,119 | 8%  | 2,139,451 | 9%  | 2,219,476 | 9%  | 2,175,117 | 9%  | 3,074,331 | 9%  |
| chr2  | 1,066,560 | 6%  | 1,194,283 | 6%  | 1,543,822 | 6%  | 1,494,213 | 6%  | 1,430,554 | 6%  | 2,123,920 | 6%  |
| chr3  | 912,484   | 5%  | 977,751   | 5%  | 1,316,531 | 5%  | 1,359,181 | 6%  | 1,279,342 | 5%  | 1,887,107 | 5%  |
| chr4  | 793,400   | 4%  | 888,564   | 5%  | 1,135,774 | 5%  | 1,126,913 | 5%  | 1,071,671 | 5%  | 1,592,381 | 5%  |
| chr5  | 1,104,065 | 6%  | 1,242,674 | 6%  | 1,556,192 | 6%  | 1,298,092 | 5%  | 1,256,534 | 5%  | 1,817,735 | 5%  |
| chr6  | 571,736   | 3%  | 639,342   | 3%  | 842,510   | 4%  | 877,186   | 4%  | 834,826   | 4%  | 1,218,586 | 4%  |
| chr7  | 897,829   | 5%  | 1,032,229 | 5%  | 1,360,788 | 6%  | 1,248,174 | 5%  | 1,181,147 | 5%  | 1,606,272 | 5%  |
| chr8  | 795,430   | 4%  | 939,915   | 5%  | 1,171,695 | 5%  | 1,153,377 | 5%  | 1,058,935 | 5%  | 1,594,127 | 5%  |
| chr9  | 607,785   | 3%  | 674,384   | 3%  | 908,369   | 4%  | 905,238   | 4%  | 840,255   | 4%  | 1,313,883 | 4%  |
| chrM  | 2,876,626 | 16% | 3,516,307 | 18% | 3,226,256 | 13% | 3,792,933 | 16% | 3,518,271 | 15% | 6,697,283 | 19% |
| chrX  | 319,319   | 2%  | 362,177   | 2%  | 446,936   | 2%  | 506,170   | 2%  | 488,387   | 2%  | 652,064   | 2%  |
| chr10 | 723,317   | 4%  | 791,066   | 4%  | 1,093,922 | 5%  | 1,149,148 | 5%  | 1,079,485 | 5%  | 1,587,325 | 5%  |
| chr11 | 347,726   | 2%  | 391,700   | 2%  | 514,879   | 2%  | 553,286   | 2%  | 536,270   | 2%  | 759,324   | 2%  |
| chr12 | 223,288   | 1%  | 235,358   | 1%  | 321,556   | 1%  | 349,406   | 1%  | 327,634   | 1%  | 482,017   | 1%  |
| chr13 | 419,723   | 2%  | 450,409   | 2%  | 582,153   | 2%  | 635,694   | 3%  | 612,351   | 3%  | 841,611   | 2%  |
| chr14 | 411,173   | 2%  | 442,534   | 2%  | 630,132   | 3%  | 663,076   | 3%  | 646,504   | 3%  | 930,410   | 3%  |
| chr15 | 312,569   | 2%  | 338,496   | 2%  | 469,305   | 2%  | 509,557   | 2%  | 514,967   | 2%  | 721,723   | 2%  |
| chr16 | 380,682   | 2%  | 395,560   | 2%  | 539,973   | 2%  | 521,071   | 2%  | 498,180   | 2%  | 705,012   | 2%  |
| chr17 | 398,036   | 2%  | 418,532   | 2%  | 583,477   | 2%  | 596,632   | 2%  | 614,753   | 3%  | 891,684   | 3%  |
| chr18 | 271,378   | 1%  | 298,331   | 2%  | 410,089   | 2%  | 447,348   | 2%  | 430,782   | 2%  | 606,798   | 2%  |
| chr19 | 264,648   | 1%  | 288,037   | 1%  | 390,276   | 2%  | 414,882   | 2%  | 387,818   | 2%  | 570,213   | 2%  |
| chr20 | 232,161   | 1%  | 251,363   | 1%  | 332,895   | 1%  | 368,150   | 2%  | 355,389   | 2%  | 511,698   | 1%  |
| chrUn | 2,831,727 | 16% | 2,179,426 | 11% | 2,537,562 | 11% | 1,898,048 | 8%  | 2,244,915 | 10% | 2,364,992 | 7%  |
