# Supplementary material
Source: PubMed Central journal article supplement (PMC3742913)
Supplement: tableS2.pdf [file tableS2.pdf]

**SIGNIFICANTLY UPREGULATED IN DI (VS LS)  
MORE THAN 1.4 FOLD**

| gene       | Fold change | gene       | Fold change | gene      | Fold change | gene           | Fold change | gene       | Fold change |
|------------|-------------|------------|-------------|-----------|-------------|----------------|-------------|------------|-------------|
| Il24       | 83.14945    | Pkib       | 7.027955    | LOC498339 | 4.789891    | Rnd1           | 4.043912    | Gtse1      | 3.655875    |
| Dsg3       | 36.05833    | Mmp16      | 6.967778    | Gabrp     | 4.763777    | Mcm5           | 4.028621    | Olr1590    | 3.629642    |
| A2m        | 27.14565    | Trim71     | 6.848962    | Lst1      | 4.754392    | Cd44           | 4.027044    | Tmem90b    | 3.629502    |
| Trem2      | 23.37725    | Nuf2       | 6.838342    | Slc9a5    | 4.741088    | Nrm            | 4.024511    | Lamc2      | 3.6291      |
| RGD1310376 | 22.29959    | Cass4      | 6.831418    | Mybl2     | 4.719162    | RGD1563235     | 4.019607    | Prtfcd1    | 3.612188    |
| Arntl2     | 17.62253    | Kng2       | 6.680863    | Adamts1   | 4.710999    | Gnaz           | 3.995657    | Kif22      | 3.590494    |
| Msc        | 16.28994    | Mcpt8      | 6.663902    | Traf4af1  | 4.663871    | Dlgap5         | 3.982949    | Fam111a    | 3.589491    |
| Kcnf1      | 15.27064    | Tmem200a   | 6.619557    | Mycn      | 4.661567    | Lhfp1          | 3.982936    | Zc3h12d    | 3.547618    |
| Nkain3     | 13.85747    | Scara5     | 6.589612    | Cd40lg    | 4.65575     | Birc3          | 3.960273    | Nacad      | 3.545775    |
| RGD1564114 | 13.50593    | Lingo1     | 6.588448    | Nfkbiz    | 4.629151    | Cd14           | 3.959804    | Lox        | 3.522663    |
| Cd300a     | 12.85527    | Prr16      | 6.562767    | Casc5     | 4.604122    | Col3a1         | 3.944986    | Lgals3     | 3.516545    |
| Aurkb      | 12.65648    | LOC685099  | 6.53631     | S100a3    | 4.600602    | Rad51          | 3.927977    | Atp12a     | 3.514722    |
| Cthrc1     | 11.9681     | Reg3b      | 6.522058    | Csdc2     | 4.570322    | Ndc80          | 3.926611    | Tead2      | 3.506752    |
| Mcpt2      | 11.69798    | Epha5      | 6.493807    | Timp1     | 4.560302    | Apobec3f       | 3.914629    | Timd2      | 3.479005    |
| Cyp1b1     | 11.63396    | Nxph3      | 6.40434     | Vstm2b    | 4.545628    | Kcna7          | 3.910285    | Hist1h2ail | 3.477969    |
| Gpr3711    | 11.22352    | Xcr1       | 6.219271    | Hist1h1b  | 4.524605    | St8sia4        | 3.898062    | Pik3r5     | 3.473951    |
| Cfi        | 10.51823    | Car3       | 6.211296    | Rgs16     | 4.51996     | Tifa           | 3.88701     | Tlr2       | 3.455087    |
| RT1-M4     | 10.24645    | Jakmip1    | 6.178388    | Col1a1    | 4.505226    | LOC497796      | 3.88502     | RGD1560556 | 3.453047    |
| Nmb        | 10.07894    | Grik2      | 6.142132    | Gas7      | 4.491125    | Ubash3a        | 3.876217    | Cd72       | 3.447683    |
| Cxcl1      | 9.731611    | Batf       | 6.010912    | Ptprz1    | 4.45962     | Cd300le        | 3.869025    | Nr5a2      | 3.446144    |
| Cenpt      | 9.393529    | Fam101a    | 6.002297    | Cd53      | 4.449535    | LOC498350      | 3.857432    | Lyc2       | 3.443319    |
| Muc15      | 9.386086    | Mrc1       | 5.985292    | Dcaf12l1  | 4.43319     | Kcnd1          | 3.856076    | F13a1      | 3.441804    |
| Rhbdl2     | 9.355104    | Tcp11      | 5.975308    | Osm       | 4.420041    | Cd38           | 3.83461     | Mcm3       | 3.440897    |
| Htr1b      | 8.992653    | Esp1       | 5.953222    | Tlr10     | 4.419256    | Itgb4          | 3.829808    | Rprm       | 3.430259    |
| Rgs14      | 8.949049    | RGD1306230 | 5.890007    | LOC691141 | 4.378333    | C1qtnf6        | 3.817396    | Kif23      | 3.428658    |
| C6         | 8.810932    | Rasgrf1    | 5.802495    | Ccl19     | 4.348757    | Cp             | 3.814873    | LOC302022  | 3.419734    |
| Mycl1      | 8.774514    | Dynlrb2    | 5.761285    | Ptger2    | 4.304178    | Ddit4l         | 3.812099    | Selplg     | 3.416684    |
| Mir503     | 8.622275    | Itgam      | 5.427869    | Ptger2    | 4.304178    | Gapt           | 3.807392    | Clec9a     | 3.415466    |
| Gpnmb      | 8.566379    | Tmem40     | 5.375028    | Grap2     | 4.294642    | Cd300a         | 3.775115    | Gli1       | 3.403262    |
| Atg9b      | 8.425609    | Crmp1      | 5.316727    | Mmp20     | 4.266329    | Ptpn7          | 3.753008    | Snx20      | 3.399041    |
| Fcgr2b     | 8.299367    | Cdca7      | 5.310774    | Top2a     | 4.264561    | Ccr2           | 3.73731     | Cdk1       | 3.394881    |
| Nsun7      | 8.246306    | Glpr1      | 5.242757    | Msr1      | 4.257606    | RGD1308226     | 3.731131    | Plcb2      | 3.392952    |
| Inhba      | 8.19408     | Cdkn2b     | 5.239243    | Cdca3     | 4.248119    | Cenpa          | 3.725468    | Ccna2      | 3.379073    |
| Dbil5      | 8.184506    | Cd80       | 5.223817    | Clec7a    | 4.24104     | RGD1565734pred | 3.708975    | P2ry12     | 3.378278    |
| Ubd        | 8.106756    | Ska3       | 5.21186     | Fam131b   | 4.226903    | Trip13         | 3.702088    | March1     | 3.372241    |
| Ypel4      | 7.958699    | C3         | 5.183885    | Oaz3      | 4.209274    | Cd276          | 3.702042    | Ly49i9     | 3.361655    |
| Fcrls      | 7.863372    | Egr2       | 5.158575    | Cdkn1a    | 4.185427    | Galnt5         | 3.700876    | C2         | 3.358216    |
| Fam12b     | 7.852227    | MGC105649  | 5.066684    | Slc10a2   | 4.176852    | Cep55          | 3.690381    | Kcnab2     | 3.355932    |
| Clec10a    | 7.754061    | Klf2c      | 5.055531    | Tlr11     | 4.160335    | Tmc1           | 3.685596    | Arl11      | 3.346755    |
| Socs3      | 7.539157    | Pgbd5      | 5.044136    | Syt12     | 4.159787    | St8sia4        | 3.680089    | Epdr1      | 3.339639    |
| Odz4       | 7.496564    | Ttc39a     | 5.037946    | Lamb3     | 4.147567    | Chac1          | 3.676915    | Rac2       | 3.327604    |
| Sele       | 7.390792    | Ccl6       | 5.013377    | Colq      | 4.131629    | Lyz2           | 3.675224    | Cdh17      | 3.313946    |
| Rab7b      | 7.26392     | Lrat       | 4.937597    | Nipal4    | 4.125721    | Rtn2           | 3.670116    | Il17re     | 3.289094    |
| Sstr3      | 7.257415    | Tubb6      | 4.894841    | Dsn1      | 4.121464    | Rap2b          | 3.668333    | Kntc1      | 3.283739    |
| Siglec1    | 7.115536    | Chodl      | 4.890495    | Slpil2    | 4.106886    | Lyc2           | 3.666942    | Creb3l3    | 3.279202    |
| Ccr1       | 7.071291    | Spag5      | 4.807541    | Dpep2     | 4.096994    | Grem2          | 3.661954    | Coro1a     | 3.276276    |
| Siglec5    | 7.054926    | Ms4a6b     | 4.79805     | Baalc     | 4.088244    | Lmo1           | 3.659093    | Car13      | 3.274818    |

| gene         | Fold change | gene       | Fold change | gene    | Fold change | gene       | Fold change | gene      | Fold change |
|--------------|-------------|------------|-------------|---------|-------------|------------|-------------|-----------|-------------|
| Fn1          | 3.274043    | Spdya      | 3.083523    | Il7r    | 2.881195    | Egr1       | 2.724829    | Fbn1      | 2.638258    |
| Tmem176a     | 3.271433    | LOC690079  | 3.08342     | Lilrb4  | 2.880717    | Lilrb3l    | 2.717795    | Mir1949   | 2.63449     |
| Bcl2a1d      | 3.264202    | LOC303566  | 3.080501    | Mmp2    | 2.880477    | Bves       | 2.717612    | Lsp1      | 2.633631    |
| A3galt2      | 3.262878    | Marcksl1   | 3.075747    | Il27ra  | 2.873812    | Tacc3      | 2.716655    | Trpv2     | 2.62954     |
| Csf1r        | 3.260541    | Kcnj5      | 3.073457    | Tacr3   | 2.871447    | Tnfsf13b   | 2.716085    | Sla       | 2.627839    |
| Kcna3        | 3.256654    | Abcb1b     | 3.072556    | Cenpi   | 2.870885    | RGD1562552 | 2.714801    | Ptprv     | 2.625477    |
| LOC685157    | 3.255375    | Fcgr2a     | 3.072499    | Mgp     | 2.864       | Trim66     | 2.71442     | Slc25a27  | 2.624556    |
| Gria2        | 3.252732    | Tyrobp     | 3.065796    | Pla2g7  | 2.861313    | Rhoh       | 2.713085    | LOC679825 | 2.622696    |
| Alox12       | 3.249347    | Tifab      | 3.06525     | Ncf2    | 2.85761     | Clec4a1    | 2.712872    | Tlr5      | 2.622451    |
| Mdga1        | 3.22192     | LOC361016  | 3.056029    | Camkv   | 2.856901    | Cd37       | 2.707946    | Psmb10    | 2.619873    |
| LOC498276    | 3.216542    | Fam129a    | 3.051859    | Syn1    | 2.856223    | lfi204     | 2.706747    | Mir423    | 2.619304    |
| Igfbp1       | 3.214916    | Wbscr17    | 3.050428    | Alox5ap | 2.855864    | Fhl3       | 2.706002    | Pstpip1   | 2.613107    |
| Inhbb        | 3.21279     | Clecsf6    | 3.034768    | Pld4    | 2.851035    | Casp4      | 2.705415    | Ube2c     | 2.61128     |
| Fcn1         | 3.212638    | Fblim1     | 3.033301    | Il21r   | 2.841557    | Casp12     | 2.703809    | Tlr7      | 2.606686    |
| Polq         | 3.209762    | Eif4ebp1   | 3.030983    | Tmsb10  | 2.840278    | Clspn      | 2.703114    | Cd69      | 2.606287    |
| Bcl11b       | 3.201863    | C4-2       | 3.028873    | Uhrf1   | 2.839003    | Cd5        | 2.701138    | Ppl       | 2.588805    |
| Il7          | 3.19026     | Dclk1      | 3.025324    | Iqgap3  | 2.826355    | Tgif1      | 2.699788    | Galnt1    | 2.587842    |
| Clec4a3      | 3.187252    | Ramp1      | 3.019541    | Hck     | 2.822532    | Dok6       | 2.699321    | Rad54l    | 2.586026    |
| LOC685157    | 3.178621    | Tmem119    | 3.01668     | Cenpq   | 2.819346    | C4b        | 2.699299    | Laptm5    | 2.584166    |
| Evi2a        | 3.176233    | Runx1      | 3.00557     | Ebi3    | 2.818137    | Macc1      | 2.696192    | Adamts12  | 2.580386    |
| Cenpf        | 3.174909    | Parvg      | 2.994097    | Lrrc33  | 2.809166    | Olr1584    | 2.693589    | Adamts7   | 2.578247    |
| Mpeg1        | 3.174288    | Il12a      | 2.985854    | Ns5atp9 | 2.808421    | C4-2       | 2.691066    | Pdpn      | 2.578013    |
| Btn1a1       | 3.173238    | Mcpt8l2    | 2.984019    | Flnc    | 2.80772     | Rin1       | 2.684308    | Timeless  | 2.576017    |
| Mir214       | 3.172485    | RGD1562091 | 2.971747    | Cnp     | 2.806361    | C1qb       | 2.683432    | Numbl     | 2.572991    |
| Gstm1        | 3.172348    | Mr1        | 2.967422    | Asf1b   | 2.804459    | RT1-Da     | 2.683309    | Lrrc36    | 2.570506    |
| Masl1        | 3.170606    | Itk        | 2.963239    | Gja1    | 2.801304    | Vav1       | 2.683216    | Fam70b    | 2.565191    |
| Osmr         | 3.164204    | Cd226      | 2.957754    | Il18r1  | 2.788863    | Mmp14      | 2.680553    | Irf8      | 2.564216    |
| Ccne1        | 3.15506     | Ly49si2    | 2.953682    | PVR     | 2.788173    | Klra2      | 2.680499    | Lcp1      | 2.563421    |
| Diras2       | 3.138511    | Ly49si3    | 2.953682    | Tgm3    | 2.776652    | Sh2b2      | 2.67545     | LOC308990 | 2.56292     |
| Prr11        | 3.136304    | Ly49si3    | 2.950342    | Capn13  | 2.774658    | Tmem176b   | 2.669964    | Mir125b-2 | 2.559104    |
| RT1-Bb       | 3.133264    | Cybb       | 2.947583    | Clec12a | 2.774275    | Irf1       | 2.669102    | Ccr5      | 2.559048    |
| Fos          | 3.127587    | Art2       | 2.942808    | Relt    | 2.771902    | Hcrt1      | 2.666934    | Card9     | 2.557288    |
| LOC100158225 | 3.124291    | Adcy7      | 2.94011     | Cks2    | 2.770315    | Col16a1    | 2.657866    | Phlda3    | 2.546385    |
| Cxcr4        | 3.123494    | Mir19a     | 2.933452    | Arid5a  | 2.769252    | Gpr153     | 2.657411    | C1s       | 2.544394    |
| Arhgap30     | 3.120523    | Slc25a24   | 2.927001    | Olr1    | 2.759056    | Rgs18      | 2.656015    | Fgr       | 2.541973    |
| Ccdc69       | 3.115614    | S100a11    | 2.924279    | Myo1g   | 2.758864    | Myo1f      | 2.654638    | Hcls1     | 2.536796    |
| Ucp2         | 3.105489    | Hk3        | 2.923421    | E2f1    | 2.758838    | Fbln1      | 2.654018    | Gbp2      | 2.534841    |
| Adcy2        | 3.102819    | Mthfd2     | 2.914135    | Tbxas1  | 2.757984    | Shc2       | 2.65363     | Ncf4      | 2.5348      |
| Vim          | 3.099264    | Arhgap9    | 2.911404    | Hfe2    | 2.752063    | P2ry13     | 2.651333    | Cmtm3     | 2.532736    |
| RT1-Ba       | 3.098304    | Myo16      | 2.90671     | Ndn     | 2.750556    | Cd4        | 2.644993    | Icam1     | 2.529106    |
| Fkbp10       | 3.095636    | Gpr68      | 2.900555    | Gpr85   | 2.750162    | Foxs1      | 2.644808    | Cxcl10    | 2.527015    |
| Uchl1        | 3.091676    | Dpysl3     | 2.897587    | Gpr34   | 2.749109    | Cdc25c     | 2.641473    | Cx3cr1    | 2.527008    |
| Dcdc2        | 3.089789    | Mcm6       | 2.897535    | Tmem136 | 2.737739    | Adam19     | 2.64005     | Cdca2     | 2.525384    |

| gene       | Fold change |
|------------|-------------|------------|-------------|------------|-------------|------------|-------------|------------|-------------|
| Hmga1      | 2.523639    | P2ry6      | 2.407448    | Lrfn4      | 2.319494    | Tshz3      | 2.226323    | Plekho1    | 2.129231    |
| Il16       | 2.519373    | Arpp21     | 2.406915    | Bmp1       | 2.319185    | Hebp2      | 2.224999    | Grem1      | 2.127634    |
| Steap1     | 2.518845    | Tmem146    | 2.405096    | RGD1309522 | 2.316527    | Slc7a5     | 2.224402    | Hmgb2      | 2.126086    |
| Tnfaip8l2  | 2.518195    | Col14a1    | 2.400731    | Rhbdf2     | 2.314225    | Adcyap1r1  | 2.223928    | RGD1563888 | 2.124105    |
| Prc1       | 2.513073    | Psd        | 2.400566    | LOC688090  | 2.312889    | Ccdc80     | 2.214134    | Arhgap15   | 2.11614     |
| Gngt2      | 2.512104    | Plk4       | 2.399701    | Tgfb1      | 2.309503    | Gstm6      | 2.213455    | Epsti1     | 2.114467    |
| Nckap1l    | 2.51197     | RT1-M1-2   | 2.399374    | Cldn4      | 2.306132    | Cmtm7      | 2.213183    | Ptprs      | 2.111623    |
| Sdk2       | 2.507793    | Serpina10  | 2.398387    | Cd40       | 2.296852    | Ppp2r2c    | 2.212603    | Ly96       | 2.107981    |
| Btla       | 2.507301    | Slamf8     | 2.395391    | Rgs1       | 2.293579    | Col4a1     | 2.208381    | Pdgfrl     | 2.105844    |
| Col5a2     | 2.504995    | Btk        | 2.39452     | Mrgprx3    | 2.292795    | Prim1      | 2.207483    | Ccdc8      | 2.103602    |
| Il1rl1     | 2.50405     | Caps2      | 2.393685    | Pik3cd     | 2.292173    | RT1-DMa    | 2.202889    | Psmb9      | 2.103244    |
| Ptprc      | 2.503629    | Fcer1g     | 2.392902    | Vangl2     | 2.289573    | Cyp21a1    | 2.20197     | Mfap4      | 2.102174    |
| Cd68       | 2.501709    | Chtf18     | 2.391077    | Adamts15   | 2.288645    | Arrdc4     | 2.196996    | Ebf4       | 2.099931    |
| Cpz        | 2.501476    | Asam       | 2.39071     | Limd2      | 2.286196    | RGD1561145 | 2.194178    | Lcp2       | 2.099394    |
| Ncf1       | 2.500186    | RGD1562284 | 2.390135    | Syt5       | 2.284993    | Pvr12      | 2.194136    | Rbm3       | 2.098717    |
| Nlrp3      | 2.499373    | Zfhx4      | 2.388303    | Sifn8      | 2.283228    | Snph       | 2.193527    | Tubb5      | 2.0982      |
| Ccdc102a   | 2.496517    | C3ar1      | 2.380362    | Abca1      | 2.281754    | Aix1       | 2.189242    | Septin1    | 2.094832    |
| Capg       | 2.495702    | Ap1s2      | 2.379223    | Mir223     | 2.281613    | Il17rb     | 2.18843     | Col5a1     | 2.090978    |
| Fcgr1a     | 2.494968    | Cspg4      | 2.378904    | Vom2r16    | 2.281225    | Gch1       | 2.187047    | Hmha1      | 2.090768    |
| C1qtnf1    | 2.494095    | Raet1l     | 2.378593    | Klf5       | 2.280083    | Mobkl2a    | 2.186668    | Ikbke      | 2.087878    |
| Hpgd       | 2.489346    | P2rx5      | 2.376642    | Lgals1     | 2.278197    | Rftn1      | 2.185836    | Gfpt2      | 2.087313    |
| Kif26b     | 2.486067    | Apol3      | 2.37473     | Paqr8      | 2.276063    | Cadm4      | 2.181602    | Reln       | 2.085154    |
| RT1-Db1    | 2.484114    | Axl        | 2.374148    | Lgals3bp   | 2.275282    | Nid67      | 2.178102    | Map1b      | 2.08345     |
| Tpbp       | 2.482489    | Ankrd13d   | 2.373839    | Aplnr      | 2.266146    | Olfm4      | 2.177481    | RGD1565672 | 2.080267    |
| RGD1564927 | 2.480491    | Clip3      | 2.372023    | Ydjc       | 2.264779    | Gnb4       | 2.173733    | Sparc      | 2.078626    |
| Adamts2    | 2.479604    | Hist1h1a   | 2.371691    | Arhgap11a  | 2.264162    | Map1a      | 2.173707    | Fxyd5      | 2.078566    |
| Ltbp2      | 2.47884     | Naaa       | 2.370782    | Col6a2     | 2.26406     | Klhl6      | 2.172182    | C1qc       | 2.078427    |
| Tmem196    | 2.478799    | Spi1       | 2.370352    | Was        | 2.26278     | Ptgis      | 2.167678    | Sirpa      | 2.077188    |
| Tnfrsf1b   | 2.477196    | Tppp3      | 2.370064    | Dscr6      | 2.262329    | Dkk2       | 2.161716    | Fes        | 2.074618    |
| Clec5a     | 2.471618    | Slc6a9     | 2.36898     | Siva1      | 2.259881    | Art4       | 2.160712    | Pcdha1     | 2.074589    |
| Syt3       | 2.467468    | E2f7       | 2.367421    | Rasgrp1    | 2.258675    | Gli3       | 2.159826    | Tmsb4x     | 2.073502    |
| Loxl2      | 2.466458    | Deadc1     | 2.354641    | Prcp       | 2.258172    | Cerk       | 2.155791    | Arpc1b     | 2.068151    |
| Apbb1ip    | 2.465762    | Thsd1      | 2.35412     | Hist1h2bn  | 2.256198    | Tsga14     | 2.152551    | Fam105a    | 2.067968    |
| Pltp       | 2.461758    | Emr1       | 2.350577    | Antxr1     | 2.254709    | Efemp2     | 2.147305    | Syn3       | 2.067736    |
| Sctr       | 2.460516    | Fas        | 2.349963    | MGC116202  | 2.251644    | Cd36       | 2.146226    | Plekhn1    | 2.065974    |
| Robo3      | 2.459649    | Ciita      | 2.348307    | C1qa       | 2.251514    | LOC361346  | 2.145464    | Anxa3      | 2.064448    |
| Tpx2       | 2.454971    | Plek       | 2.346341    | Scn9a      | 2.249997    | Ccnb1      | 2.14417     | Runx2      | 2.059206    |
| Gna15      | 2.448788    | Snai1      | 2.34633     | Dkk3       | 2.249379    | Lbp        | 2.143402    | Nipsnap3b  | 2.055474    |
| Tgfb2      | 2.448029    | Opn3       | 2.343616    | Bco2       | 2.248701    | Cd8a       | 2.143147    | Flna       | 2.053936    |
| Lrrn4cl    | 2.446224    | Anxa1      | 2.342488    | Rasl10a    | 2.246923    | Fam83b     | 2.141922    | Racgap1    | 2.053222    |
| Cd93       | 2.445756    | Ezh2       | 2.34007     | Smtnl2     | 2.243339    | LOC500413  | 2.141861    | Nrp2       | 2.052529    |
| Mctp2      | 2.445365    | Cenpk      | 2.337686    | Hist1h2bl  | 2.242861    | Rad54b     | 2.1394      | Cadm3      | 2.050779    |
| Baat       | 2.443958    | Il28ra     | 2.336554    | Brca2      | 2.238324    | LOC689296  | 2.139109    | Rab27a     | 2.050176    |
| Abhd15     | 2.440679    | Fabp4      | 2.334795    | S100a10    | 2.23807     | Tsc22d1    | 2.138053    | Pcdha9     | 2.050135    |
| Mcoln3     | 2.435112    | Chaf1b     | 2.332398    | Unc93b1    | 2.236169    | Pole2      | 2.135995    | Ednra      | 2.04199     |
| Bub1       | 2.431109    | Cd84       | 2.329705    | Anxa2      | 2.23588     | Steap4     | 2.135524    | Il6r       | 2.04181     |
| Pi16       | 2.429173    | Col1a2     | 2.329091    | Rad18      | 2.235156    | Cpne8      | 2.134721    | Pcdha8     | 2.040705    |
| MGC112715  | 2.42542     | Tes        | 2.32709     | Mir24-2    | 2.23382     | P2ry10     | 2.134419    | Rnasel     | 2.04022     |
| Septin6    | 2.423054    | Dnm1       | 2.322567    | Dapp1      | 2.232152    | Arhgap25   | 2.132426    | Pcdha11    | 2.039584    |
| Pkmyl1     | 2.420803    | Ncam1      | 2.321969    | Cxcl11     | 2.226633    | Cacnb3     | 2.131068    | F2rl1      | 2.033012    |
| RGD1560691 | 2.420455    | Syk        | 2.321966    | Aldh1a2    | 2.226398    | Mmp28      | 2.130046    | Irf5       | 2.032791    |

| gene       | Fold change |
|------------|-------------|------------|-------------|------------|-------------|------------|-------------|------------|-------------|
| Arnt2      | 2.031385    | Prdm1      | 1.952348    | Meis3      | 1.873271    | Mrc2       | 1.81982     | Sema4c     | 1.771386    |
| Gm2a       | 2.030558    | Pcdha7     | 1.952307    | Cd83       | 1.872744    | Gypc       | 1.819477    | Limk1      | 1.76976     |
| Ttc9       | 2.028265    | Abr        | 1.951332    | Mbnl3      | 1.871999    | RGD1304693 | 1.819044    | Rab31      | 1.76967     |
| Rgs19      | 2.02715     | Tiam1      | 1.951044    | Tor3a      | 1.87144     | Hist2h3c2  | 1.817013    | Tmem88     | 1.768226    |
| Sass6      | 2.023492    | Gains      | 1.947442    | Fgl2       | 1.870485    | Il18bp     | 1.816149    | RGD1308019 | 1.767099    |
| Ly86       | 2.020739    | RGD1566107 | 1.947365    | Dlg4       | 1.869631    | Ctla2a     | 1.81546     | Pola2      | 1.766788    |
| Chsy1      | 2.017165    | Cdc7       | 1.946672    | Ccl28      | 1.869518    | Dctd       | 1.815243    | Rab3d      | 1.765949    |
| Gpr183     | 2.015907    | RGD1565785 | 1.943485    | Plp2       | 1.868411    | Gls        | 1.81437     | Cd300lf    | 1.765482    |
| Dse        | 2.014863    | Wdr62      | 1.942628    | Stat4      | 1.865848    | Arhgdib    | 1.814266    | Pdlim7     | 1.765365    |
| Xk         | 2.014798    | Prex1      | 1.940838    | Dtx4       | 1.863958    | Lipe       | 1.814018    | Ifitm3     | 1.765122    |
| Ankrd6     | 2.013858    | Agap2      | 1.938982    | Dapl1      | 1.862938    | Kif3c      | 1.813672    | Mical1     | 1.764089    |
| Col8a1     | 2.013624    | Tpm1       | 1.93845     | Cntrob     | 1.862887    | B3galnt1   | 1.812959    | Pld2       | 1.763821    |
| Pcdhb5     | 2.009253    | Elk3       | 1.936443    | Sertad4    | 1.862698    | Gpr39      | 1.812857    | S1pr2      | 1.762437    |
| Tnfrsf1a   | 2.007192    | Ctss       | 1.936093    | Ugcg       | 1.86211     | Fam113b    | 1.812783    | Fgd2       | 1.761495    |
| Nradd      | 2.006014    | Znf483     | 1.933695    | Gpr155     | 1.862024    | Elf3       | 1.811093    | Vwa5a      | 1.760899    |
| Dynlt1     | 2.005472    | Prkcb      | 1.933683    | Egfl8      | 1.85918     | RT1-M3-1   | 1.808957    | Slc27a3    | 1.757719    |
| Abcb4      | 2.001491    | Slc7a2     | 1.932235    | Caskin1    | 1.8584      | Hfe        | 1.808515    | Hsd3b7     | 1.756572    |
| Ier5       | 2.001186    | Ankrd39    | 1.928909    | Fyb        | 1.85584     | Elmo1      | 1.807589    | Galnt4     | 1.755024    |
| Adora1     | 2.000668    | Tlr1       | 1.926649    | Pcdha4     | 1.855571    | Ier3       | 1.807365    | Cdh11      | 1.754304    |
| Cnrip1     | 2.00029     | Pappa      | 1.925762    | Lrsam1     | 1.853872    | Cacna2d1   | 1.80531     | Kcnk6      | 1.754122    |
| LOC363326  | 2.000043    | Rab19      | 1.925447    | Fkbp7      | 1.853733    | Cyth4      | 1.805271    | Scarf2     | 1.750346    |
| Lhfp12     | 1.99955     | Map4k1     | 1.923786    | Heph       | 1.852779    | B4galt5    | 1.803335    | Lmo2       | 1.749166    |
| Aph1b      | 1.99611     | Crispld1   | 1.922329    | Tcea2      | 1.852646    | Sema3f     | 1.802404    | Entpd1     | 1.748027    |
| Galnt13    | 1.994389    | RGD1562342 | 1.921135    | Cst3       | 1.852002    | Gucy1a3    | 1.800804    | Emp3       | 1.747859    |
| Tekt1      | 1.992146    | Rgs10      | 1.920746    | Tmem26     | 1.850885    | Pafah1b3   | 1.800679    | Ifi47      | 1.747122    |
| MGC105567  | 1.991831    | RGD1560010 | 1.918927    | LOC499136  | 1.850308    | Krt8       | 1.799435    | Rgma       | 1.746973    |
| Pcdha10    | 1.988488    | Lzts1      | 1.91855     | RGD1305939 | 1.849902    | Mcm2       | 1.7991      | Olfml3     | 1.746595    |
| Rab38      | 1.987168    | RGD1565355 | 1.91567     | Abcg1      | 1.849386    | Asns       | 1.798578    | Ksr1       | 1.745101    |
| RGD1308165 | 1.986741    | Lpxn       | 1.913799    | Cald1      | 1.848576    | Car15      | 1.798477    | Ets1       | 1.743779    |
| Pcdhac1    | 1.98659     | Tnfrsf9    | 1.913798    | Prkcdpb    | 1.847316    | Casp1      | 1.797649    | Sfxn3      | 1.743212    |
| Pcdha5     | 1.985361    | Dyrk3      | 1.913703    | Sec14l2    | 1.846596    | Psmb8      | 1.796577    | Tap2       | 1.742387    |
| Loxl1      | 1.982659    | Ifngr2     | 1.910972    | MGC108823  | 1.84647     | Lmnb1      | 1.794221    | Prrx1      | 1.741359    |
| Fanca      | 1.981746    | Actn1      | 1.909878    | Ccdc23     | 1.844251    | Apaf1      | 1.794133    | Slc15a3    | 1.740948    |
| Rcn1       | 1.980434    | Tnfrsf26   | 1.90978     | Pcdha12    | 1.844241    | Bzw2       | 1.792353    | Cwh43      | 1.738197    |
| Adora2b    | 1.979314    | Dbn1       | 1.906304    | Pid1       | 1.842997    | Cd74       | 1.790308    | RT1-DMb    | 1.734815    |
| Gpr18      | 1.977655    | Spef2      | 1.905799    | Prrg1      | 1.842089    | Slc39a14   | 1.789344    | Ddah2      | 1.734344    |
| Arb2       | 1.977082    | Tap1       | 1.904671    | Ctsk       | 1.841658    | Tspan8     | 1.788619    | Map3k1     | 1.729597    |
| Klf6       | 1.975118    | Stard6     | 1.904102    | Kif21b     | 1.839513    | Psd4       | 1.787315    | Vasp       | 1.728887    |
| Junb       | 1.971126    | Tmem229b   | 1.900583    | Bcmo1      | 1.839192    | F2r        | 1.786037    | Tc2n       | 1.728634    |
| Pcdha3     | 1.968496    | Cbx2       | 1.899236    | Des        | 1.837448    | Cldn1      | 1.78576     | Zbtb25     | 1.72845     |
| Apobec1    | 1.968199    | Itga5      | 1.896595    | Tcirg1     | 1.834628    | Irak3      | 1.784296    | Casp3      | 1.728433    |
| RGD1311952 | 1.96534     | Dock11     | 1.890272    | RGD1311946 | 1.831894    | Anxa5      | 1.782131    | Gja4       | 1.727844    |
| Pcdha6     | 1.963931    | Pycard     | 1.887116    | Bak1       | 1.825685    | Lpar6      | 1.779522    | Nlrp1a     | 1.726687    |
| Aif1       | 1.962325    | Col5a3     | 1.885736    | Bhlhe22    | 1.825071    | Irf4       | 1.778448    | Adam23     | 1.725998    |
| Pcdha2     | 1.961908    | Bace2      | 1.885628    | Cfh        | 1.823905    | Ikzf1      | 1.776279    | Sgtb       | 1.725378    |
| Serpini1   | 1.959383    | Kirrel     | 1.885116    | Ralgds     | 1.822869    | Pcdhb20    | 1.775658    | Plod2      | 1.72132     |
| Fermt3     | 1.958377    | Donson     | 1.884323    | Olfml2b    | 1.822654    | Pqlc3      | 1.775356    | Map4k4     | 1.721041    |
| Gmnn       | 1.956311    | Smpdl3b    | 1.884105    | Tmem20     | 1.822009    | Rarres2    | 1.774715    | RGD1309543 | 1.719257    |
| Lai2       | 1.956194    | Pik3r6     | 1.882293    | Myof       | 1.821605    | Fut4       | 1.774579    | Kcnd3      | 1.718492    |
| Ptk7       | 1.952787    | Wdhd1      | 1.879711    | Impdh1     | 1.821493    | RGD1566001 | 1.774074    | Tmem194b   | 1.717446    |
| RGD1560455 | 1.952676    | Notch3     | 1.875692    | Nfkbie     | 1.820561    | Fut9       | 1.77232     | Tcf3       | 1.717161    |
| Pcdhac2    | 1.952394    | Upp1       | 1.874689    | Hoxc9      | 1.82036     | Unc13d     | 1.771581    | Pla2r1     | 1.716391    |

| gene       | Fold change | gene         | Fold change | gene       | Fold change | gene       | Fold change | gene       | Fold change |
|------------|-------------|--------------|-------------|------------|-------------|------------|-------------|------------|-------------|
| Zfp385a    | 1.714864    | Geft         | 1.666809    | Txnrd3     | 1.620886    | Map1d      | 1.576751    | Pla2g15    | 1.540983    |
| Inpp5d     | 1.713504    | Mfng         | 1.664207    | Tlr4       | 1.620878    | Dopey2     | 1.576469    | Cldn7      | 1.540241    |
| Grid2      | 1.712194    | lsg20        | 1.663782    | Avpr1a     | 1.620193    | Mical2     | 1.575748    | RGD1560108 | 1.53924     |
| Acer2      | 1.71204     | Gpr171       | 1.663541    | Tacc1      | 1.619674    | Cdh6       | 1.574855    | Abi3       | 1.539131    |
| Palb2      | 1.710675    | Tpst1        | 1.663221    | Pole       | 1.619303    | Cyp4a8     | 1.574767    | Jmjd7      | 1.534946    |
| Vat1       | 1.709241    | Serpinb9     | 1.658666    | Klf11      | 1.619231    | Ppp1r9b    | 1.574124    | Prr13      | 1.532898    |
| Sbno2      | 1.709193    | Tmtc2        | 1.657834    | Cxadr      | 1.618914    | Trim16     | 1.573896    | Frk        | 1.531736    |
| Itga1      | 1.706255    | Map7d1       | 1.657392    | Abhd4      | 1.617156    | LOC654482  | 1.573035    | Rnd2       | 1.53115     |
| Tnfaip2    | 1.70597     | Il10ra       | 1.656377    | Paqr4      | 1.616814    | Rpp38      | 1.57226     | Mir301a    | 1.530964    |
| Aph1b      | 1.705665    | Gadd45b      | 1.653467    | Sntb1      | 1.61588     | Odz3       | 1.569283    | Anubl1     | 1.528606    |
| RGD1308626 | 1.704722    | Vav3         | 1.652677    | RGD1312026 | 1.615474    | Elf4       | 1.568445    | Nod1       | 1.52691     |
| Pik3ip1    | 1.704601    | Slc44a1      | 1.652298    | Sorcs2     | 1.61412     | Ptafr      | 1.567549    | Ccdc34     | 1.52652     |
| Srd5a1     | 1.703558    | Slc7a1       | 1.650258    | Slc39a6    | 1.613333    | Dusp18     | 1.566179    | Sh2b3      | 1.526291    |
| Ccnj1      | 1.702438    | Cygb         | 1.650258    | Abcb10     | 1.612798    | Chml       | 1.565869    | Dram       | 1.526291    |
| Mdc1       | 1.701834    | Tmem164      | 1.649977    | Srd5a3     | 1.611727    | Wfdc2      | 1.565826    | Pycr2      | 1.52624     |
| Itpr3      | 1.700808    | Gltp         | 1.649945    | Tbc1d9     | 1.611045    | Vcam1      | 1.56521     | Stat3      | 1.525592    |
| Nrarp      | 1.700744    | Rab15        | 1.649305    | Brsk1      | 1.610965    | Sox18      | 1.565063    | Rgs3       | 1.524595    |
| Parp9      | 1.69983     | Slc26a2      | 1.648533    | Pkia       | 1.610832    | Klhf5      | 1.564372    | Esy11      | 1.522214    |
| Cdc42ep5   | 1.699031    | Leprel2      | 1.648493    | Cdcp1      | 1.6099      | Ssbp4      | 1.564283    | Cd48       | 1.522141    |
| Gpm6b      | 1.69792     | Lyn          | 1.648057    | Aldh18a1   | 1.609756    | Nmi        | 1.564137    | Hoxc8      | 1.521078    |
| Plscr3     | 1.697819    | Schip1       | 1.64752     | Ddx59      | 1.609204    | H3f3b      | 1.563711    | Armcx2     | 1.52033     |
| Gpr65      | 1.696526    | LOC500392    | 1.646538    | Fam83f     | 1.604026    | RGD1309362 | 1.563337    | Atad2      | 1.519987    |
| Snn        | 1.696094    | Unc119       | 1.644528    | Epha7      | 1.603016    | Rhog       | 1.562187    | Ldb2       | 1.519577    |
| Irgm       | 1.69582     | Rhob         | 1.643625    | Fstl1      | 1.602681    | Sl3gal4    | 1.561285    | Zfp40      | 1.519525    |
| Fam84a     | 1.694997    | Adamts5      | 1.643601    | Tmem43     | 1.602546    | Il17rc     | 1.560656    | Homer3     | 1.519341    |
| Tpm2       | 1.693582    | Tank         | 1.642831    | Tax1bp3    | 1.602306    | Rbl1       | 1.560256    | Calhm2     | 1.519253    |
| Wisp1      | 1.690112    | LOC684352    | 1.64207     | Ecop       | 1.601078    | Rpl31      | 1.56011     | Tspo       | 1.518433    |
| Fgf12      | 1.688014    | Foxm1        | 1.641717    | Npc2       | 1.598876    | Nap1l1     | 1.559708    | Hrh2       | 1.517802    |
| C1r        | 1.687709    | Rab8b        | 1.641387    | Irak4      | 1.598688    | Cbr1       | 1.559616    | Frem1      | 1.517158    |
| Bcl2l11    | 1.68713     | Tapbpl       | 1.640095    | Bin2       | 1.598398    | Il1rap     | 1.55946     | Emilin1    | 1.51666     |
| Tagln2     | 1.685815    | Efh2         | 1.639487    | Tp53i13    | 1.598162    | Tspan13    | 1.558499    | Cd6        | 1.516186    |
| Prr5l      | 1.685461    | Klf10        | 1.639202    | C1qtnf5    | 1.597225    | Arhgef2    | 1.557806    | Ptgrn      | 1.515526    |
| Pmm1       | 1.68436     | LOC100310874 | 1.637957    | Pak6       | 1.595955    | Rgs4       | 1.556962    | RT1-N2     | 1.515172    |
| Ikbp1      | 1.683765    | Sh3bp1       | 1.635505    | Pcolce     | 1.595814    | Bmf        | 1.556667    | Clec11a    | 1.514948    |
| Cacna1c    | 1.682437    | Tmem49       | 1.635491    | Shroom3    | 1.594845    | Lpin2      | 1.556544    | Dcakkd     | 1.513894    |
| Jak3       | 1.681794    | Psen2        | 1.634254    | Aacs       | 1.593565    | Serpine2   | 1.555216    | Mbp        | 1.513163    |
| Pik3c2b    | 1.68136     | Abcc5        | 1.632873    | Mcm4       | 1.592904    | Fam110b    | 1.555063    | Card6      | 1.512867    |
| Gab2       | 1.681168    | Hells        | 1.632047    | Fhl2       | 1.592824    | Arhgap20   | 1.554975    | Rnase4     | 1.512558    |
| Enc1       | 1.680719    | Tlr6         | 1.630326    | Blnk       | 1.591331    | RGD1306959 | 1.553663    | LOC362419  | 1.511969    |
| Pla2g4a    | 1.679308    | Rgs2         | 1.63023     | Pcdh18     | 1.591292    | Map3k8     | 1.552795    | Afap1      | 1.510949    |
| Hhex       | 1.679245    | Sh2d4a       | 1.629036    | Mgmt       | 1.589832    | Gpt2       | 1.551342    | Nfkb2      | 1.510433    |
| Fam102b    | 1.678831    | Cirbp        | 1.628426    | Col6a3     | 1.58798     | Arhgap4    | 1.551261    | Tcf21      | 1.510357    |
| LOC500956  | 1.678566    | LOC683626    | 1.626887    | Akna       | 1.587844    | Cntln      | 1.551193    | Gnai2      | 1.510095    |
| Pvrl4      | 1.677581    | Csda         | 1.626773    | P2ry14     | 1.586095    | Cand2      | 1.550868    | Mst4       | 1.509945    |
| Gpr37      | 1.677248    | Endog        | 1.626282    | Sult1a1    | 1.585403    | Fhod1      | 1.548879    | Robo1      | 1.509856    |
| Flot2      | 1.675575    | Fetub        | 1.625728    | Rpp21      | 1.585243    | Gng10      | 1.547608    | Parp14     | 1.509402    |
| Lrrc8c     | 1.67498     | Gusb         | 1.625726    | Soat1      | 1.584431    | Rfx5       | 1.54698     | Loxl3      | 1.506955    |
| Itga4      | 1.674392    | Pcdh19       | 1.624527    | Slk10      | 1.584306    | Porcn      | 1.546818    | Cybrd1     | 1.506444    |
| Scarb1     | 1.673919    | Bgn          | 1.62435     | Plxna3     | 1.58367     | Sh2d3c     | 1.544511    | Flt4       | 1.504875    |
| Cxcl16     | 1.670464    | Plcd1        | 1.622982    | Pol2       | 1.58232     | Ssfa2      | 1.544444    | Ubd1       | 1.504346    |
| Myadm      | 1.669675    | Rps16        | 1.622949    | Gulp1      | 1.58014     | Chst14     | 1.543731    | Pnrc1      | 1.504056    |
| Cd34       | 1.669557    | Trerf1       | 1.622327    | Ltbp3      | 1.579914    | Cd97       | 1.542909    | Btg1       | 1.501946    |
| Acap1      | 1.669426    | Txnip        | 1.621628    | Sh3bgrl3   | 1.579014    | Sec14l1    | 1.542657    | G7c        | 1.500737    |
| Fzd6       | 1.668416    | Gsdmd        | 1.621531    | RGD1566265 | 1.578876    | Zfp280b    | 1.54184     | Arid5b     | 1.500392    |
| Bicd1      | 1.666999    | Capn5        | 1.621379    | Pdgfrb     | 1.578664    | Rassf5     | 1.541158    | Dnase2a    | 1.500279    |

| gene       | Fold change | gene    | Fold change |
|------------|-------------|------------|-------------|------------|-------------|------------|-------------|---------|-------------|
| Sh3bp4     | 1.499636    | Pald       | 1.476295    | Hcn2       | 1.45838     | Calcr1     | 1.436504    | Ogn     | 1.416878    |
| Sv2a       | 1.499527    | Dnmt1      | 1.475562    | Smc2       | 1.457983    | Ptpn9      | 1.436247    | Rps24   | 1.416329    |
| Gpx8       | 1.497478    | Sat1       | 1.475158    | LOC679651  | 1.457062    | Pcdhga12   | 1.435402    | Abcg314 | 1.415629    |
| Igtp       | 1.496557    | Spon1      | 1.474739    | Fgfr2      | 1.456261    | Csrp1      | 1.43501     | Zfp385b | 1.415517    |
| Slc44a2    | 1.496121    | Zcchc11    | 1.474332    | Pdgfra     | 1.456149    | Zfp3611    | 1.434963    | Rpusd2  | 1.414208    |
| Lamc1      | 1.495703    | RT1-CE5    | 1.474033    | Ampd3      | 1.455929    | Mnt        | 1.43407     | Ddx41   | 1.413399    |
| Fry        | 1.492696    | Prickle2   | 1.472621    | Usp28      | 1.455109    | Dennd2c    | 1.433447    | Prss23  | 1.412944    |
| Zeb2       | 1.4917      | Col18a1    | 1.472006    | Opctl      | 1.453943    | Pcdhga11   | 1.433246    | Septin9 | 1.412307    |
| Ng35       | 1.489778    | Il6st      | 1.471749    | Lpcat1     | 1.453901    | Rps4x      | 1.432495    | Zbtb38  | 1.412289    |
| Klhl14     | 1.489511    | St5        | 1.470962    | Slc39a1    | 1.453662    | Plk3ap1    | 1.432325    | Ssh2    | 1.412266    |
| RGD1309104 | 1.489104    | Pdgfd      | 1.47031     | Trpm3      | 1.453631    | Rhobtb3    | 1.431794    | Pygb    | 1.410815    |
| Pea15a     | 1.489052    | Fam198b    | 1.469483    | Pcdhga3    | 1.452173    | Plscr4     | 1.431439    | Cdca4   | 1.409831    |
| Aspm       | 1.488724    | Tmem132a   | 1.4694      | Ranbp17    | 1.450908    | Pcdhga2    | 1.431055    | Zcchc24 | 1.409763    |
| Pdgfb      | 1.48771     | Pde4b      | 1.468374    | Fam3c      | 1.450757    | Pcdhga5    | 1.430527    | Slc9a1  | 1.408362    |
| Sh3kbp1    | 1.487696    | Fam49a     | 1.468282    | Pcdhga7    | 1.450684    | Ehd4       | 1.43039     | Ocr1    | 1.408087    |
| Mdm1       | 1.487624    | Shc1       | 1.468048    | Il13ra1    | 1.450567    | Tnip2      | 1.429611    | Ppil1   | 1.406935    |
| Ccdc82     | 1.487134    | Rpl22      | 1.467853    | Enah       | 1.448357    | Ttpal      | 1.429173    | Pip4k2b | 1.405288    |
| Gmpr       | 1.487045    | Gucy1b3    | 1.467305    | Hdgfrp3    | 1.448075    | Cnif       | 1.429001    | Camk2d  | 1.404922    |
| Npdc1      | 1.486827    | Sall2      | 1.465697    | Pcdhgb8    | 1.445231    | Abcg313    | 1.427456    | Pcdhga9 | 1.40452     |
| Maged2     | 1.486543    | Rbpj       | 1.463545    | Fmod       | 1.44512     | RGD1561149 | 1.426289    | Xdh     | 1.404429    |
| Cep97      | 1.486497    | Setd7      | 1.463215    | B4galt6    | 1.444988    | Bmp6       | 1.425782    | Agpat2  | 1.40413     |
| Timp2      | 1.485981    | RT1-N1     | 1.462999    | Dtx3l      | 1.443557    | Impa2      | 1.425626    | Tspan9  | 1.404082    |
| Fam38a     | 1.484029    | Hoxd9      | 1.462835    | Nck2       | 1.442631    | Slc46a1    | 1.425066    | Tcof1   | 1.403316    |
| Ano1       | 1.483871    | Wdr6       | 1.462791    | Znf608     | 1.440896    | Rai14      | 1.424515    | Ppap2a  | 1.403231    |
| Pgm2l1     | 1.482401    | Mirlet7a-1 | 1.462583    | Csgalnact1 | 1.439897    | Stxbp1     | 1.423498    | Phlda1  | 1.402887    |
| Sh3bgrl    | 1.482053    | Tmem123    | 1.461169    | Klhl29     | 1.438947    | Scmh1      | 1.421823    | Dgcr14  | 1.402534    |
| Itgb3bp    | 1.481466    | Lmf2       | 1.46102     | Ilvbl      | 1.438777    | Tmed3      | 1.421527    | Syt11   | 1.402073    |
| Mboat1     | 1.481184    | Ppp1r14b   | 1.460343    | Lyst       | 1.43817     | Tmem2      | 1.420004    | Notch2  | 1.402054    |
| Gnpda2     | 1.480679    | Tex10      | 1.460217    | Cdh3       | 1.437234    | Arhgef6    | 1.418615    | Slc2a8  | 1.400261    |
| Il1r1      | 1.479091    | Slc31a2    | 1.458806    | Gpc3       | 1.437006    | Gimap5     | 1.417736    | Arrdc1  | 1.400236    |

## SIGNIFICANTLY DOWNREGULATED IN DI (VS LS) (TO LESS THAN 0.6 FOLD)

| gene       | Fold change |
|------------|-------------|------------|-------------|------------|-------------|------------|-------------|------------|-------------|
| Gabrb1     | 0           | RT1-EC2    | 0.072724    | Acox2      | 0.139741    | Akr1b8     | 0.197842    | Ppef2      | 0.229972    |
| Kcnk16     | 0           | Snca       | 0.074562    | Slc7a13    | 0.141938    | Ccna1      | 0.198776    | Cyp2d3     | 0.23027     |
| Scgb1c1    | 0           | Slc22a13   | 0.078       | Gjd2       | 0.149182    | Kap        | 0.200207    | RGD1305627 | 0.232617    |
| Olr47      | 0           | Olr1326    | 0.078722    | Gapdh-ps1  | 0.159225    | Areg       | 0.201881    | Ifit1      | 0.233909    |
| Cym        | 0           | Defb42     | 0.082545    | Dhrs7      | 0.15955     | Frmf3      | 0.202374    | Wnt2b      | 0.235518    |
| Serpinh2   | 0.013659    | Tm4sf20    | 0.086188    | LOC680734  | 0.160824    | Iqch       | 0.202903    | Chrna2     | 0.23722     |
| Cyp8b1     | 0.019777    | RGD1565166 | 0.087252    | Ccl1       | 0.162501    | Cyp2d5     | 0.204623    | Akr1c12    | 0.23836     |
| Slc7a12    | 0.025549    | Foxn4      | 0.095457    | Slc35f1    | 0.165305    | Mogat2     | 0.206481    | Dio2       | 0.238609    |
| LOC361914  | 0.02696     | Slc22a7    | 0.103644    | Gc         | 0.167232    | Mir185     | 0.207715    | Mlc1       | 0.238704    |
| Cyp2c11    | 0.03077     | Cabp7      | 0.104006    | Hnmt       | 0.175538    | B3gat1     | 0.211829    | Usp29      | 0.241352    |
| Anxa13     | 0.033898    | Tff3       | 0.108102    | Uncx       | 0.176962    | Ppic       | 0.218353    | Akr1c13    | 0.241884    |
| Olr1331    | 0.043364    | Klk1b21    | 0.110587    | Rgn        | 0.177961    | Grpr       | 0.220631    | Mylpf      | 0.246184    |
| RT1.aa     | 0.05031     | Sds        | 0.110709    | Gtpbp4     | 0.179649    | Gucy1b2    | 0.223198    | Ntrk2      | 0.246492    |
| Slco1a1    | 0.051817    | Cftr       | 0.116516    | Tal2       | 0.18099     | LOC498330  | 0.2233      | Cyp2d1     | 0.24943     |
| Aldh1b1    | 0.058689    | RGD1304731 | 0.119168    | Mir326     | 0.182101    | Col9a1     | 0.225727    | Slc16a4    | 0.250784    |
| Hsd3b6     | 0.061384    | Ly49i5     | 0.121002    | Nhlh2      | 0.182366    | Akr1c12l1  | 0.226539    | Grm8       | 0.252987    |
| Sptlc3     | 0.062514    | Hormad2    | 0.131552    | Mir3593    | 0.182611    | Ldhd       | 0.227278    | Cyp4a2     | 0.253998    |
| Wisp3      | 0.063111    | Cacng5     | 0.132744    | RGD1562658 | 0.188583    | Afm        | 0.227687    | Ppfia4     | 0.255932    |
| RGD1562492 | 0.065209    | Ky         | 0.133759    | Sv2b       | 0.189557    | RGD1564865 | 0.228126    | Cdh7       | 0.256397    |
| Atp1a4     | 0.066835    | RGD1563714 | 0.138113    | Akr1c14    | 0.197534    | Cryab      | 0.229551    | Gcm1       | 0.257429    |

| gene       | Fold change | gene       | Fold change | gene       | Fold change | gene      | Fold change | gene       | Fold change |
|------------|-------------|------------|-------------|------------|-------------|-----------|-------------|------------|-------------|
| Prrt1      | 0.257886    | Hsph1      | 0.322612    | Ccrn4l     | 0.384106    | Stom      | 0.431249    | Tnxa       | 0.467817    |
| Kcna5      | 0.25795     | Gpr165     | 0.323778    | Kcnk3      | 0.384144    | Aadat     | 0.431836    | Slc16a14   | 0.468515    |
| RGD1562673 | 0.260275    | Cdo1       | 0.32423     | Bst2       | 0.384445    | Slc15a2   | 0.432062    | Pzp        | 0.469001    |
| Main1      | 0.261171    | Mcoln2     | 0.324364    | UST4r      | 0.384613    | Nxph4     | 0.433409    | Adcy1      | 0.469105    |
| Melk       | 0.263159    | Gsta3      | 0.325665    | Smpd3      | 0.385744    | Acss2     | 0.434623    | RGD1560471 | 0.469291    |
| Lrtm2      | 0.263692    | Klk1b3     | 0.325942    | RT1-T24-3  | 0.38651     | lyd       | 0.436021    | Dnaja4     | 0.469704    |
| Tnmd       | 0.264181    | Ugt2b36    | 0.332366    | Tnfrsf11b  | 0.386628    | Slc38a3   | 0.437274    | Ak3l1      | 0.470015    |
| LOC360919  | 0.264456    | A2bp1      | 0.335212    | Chrne      | 0.387094    | Cilp      | 0.437922    | RGD1309534 | 0.470328    |
| Egf        | 0.264639    | Anpep      | 0.340844    | Pgr        | 0.387258    | PKlr      | 0.439021    | Tex15      | 0.470742    |
| Mrap       | 0.264961    | Slc22a9    | 0.341947    | RGD1304644 | 0.388328    | Cbs       | 0.439181    | Pim3       | 0.470996    |
| Cyp4a2     | 0.266555    | Nefm       | 0.342241    | Fam189b    | 0.388657    | Cycc      | 0.440135    | Alpl       | 0.472873    |
| Cyp4a3     | 0.267575    | Trank1     | 0.345351    | Clec2l     | 0.388905    | Apom      | 0.44091     | Sult5a1    | 0.473418    |
| RGD1561849 | 0.270924    | Rdh2       | 0.346105    | Clrn3      | 0.389155    | Enpp3     | 0.441283    | Pdpx       | 0.475382    |
| Asrgl1     | 0.272912    | Fmo3       | 0.348259    | Nat8       | 0.390901    | Hagh      | 0.442052    | Trpc5      | 0.475737    |
| Ihh        | 0.275958    | Akr7a3     | 0.348363    | Rfx6       | 0.392238    | Slc39a8   | 0.443626    | Acmsd      | 0.475807    |
| Gcgr       | 0.276076    | Rdh7       | 0.34918     | Slc25a30   | 0.394758    | Sts       | 0.44502     | Ccl5       | 0.475993    |
| Cpne4      | 0.276362    | Prep       | 0.349271    | Nalcn      | 0.395319    | Pecr      | 0.445025    | Mme        | 0.476116    |
| Casq1      | 0.278086    | Abca4      | 0.350592    | Apoc2      | 0.395844    | Tmem86a   | 0.445854    | Aqp1       | 0.47706     |
| Slco1a5    | 0.278353    | LOC501038  | 0.353181    | LOC494499  | 0.396287    | Hrasls    | 0.445896    | Slc2a5     | 0.477155    |
| Exd1       | 0.279968    | Mapk10     | 0.353316    | Csad       | 0.398955    | Cryz      | 0.446432    | Basp1      | 0.477737    |
| Me1        | 0.280492    | Slc22a12   | 0.355296    | Zfp93      | 0.401237    | Apoh      | 0.446823    | Ppm1k      | 0.47819     |
| Coch       | 0.280899    | Proc       | 0.356592    | Oat        | 0.40145     | Nefh      | 0.447267    | Snx7       | 0.47837     |
| Dio1       | 0.283558    | Slc47a2    | 0.357692    | Umod       | 0.401941    | Gsta2     | 0.447537    | Slc17a2    | 0.478514    |
| Nptx1      | 0.284437    | Mbl1       | 0.358407    | Nox4       | 0.402196    | Aspdh     | 0.44775     | Lipg       | 0.479377    |
| Cml2       | 0.286799    | Ghr        | 0.35869     | Ggh        | 0.403689    | Hrsp12    | 0.44785     | Hspa8      | 0.479399    |
| Odc1       | 0.287664    | Asgr1      | 0.35972     | Tigd3      | 0.404585    | Dmgdh     | 0.448695    | Fam188a    | 0.479466    |
| Pou3f1     | 0.287679    | Lactb2     | 0.36107     | Gclm       | 0.405358    | Cyp2j3    | 0.449124    | Fmo2       | 0.479694    |
| Hsd17b1    | 0.289839    | Sspo       | 0.361783    | Elfn1      | 0.406089    | Nlrp6     | 0.449126    | Galnt14    | 0.480001    |
| Trim63     | 0.290424    | Hao2       | 0.363891    | Slc5a9     | 0.407191    | Lrrc10b   | 0.449233    | Spo11      | 0.480219    |
| Mx2        | 0.290627    | Prlr       | 0.363899    | Gjb2       | 0.407666    | LOC367975 | 0.449658    | Fam43a     | 0.480601    |
| Osgin1     | 0.292738    | Slc23a1    | 0.365586    | Slc3a1     | 0.408081    | Slc21a4   | 0.450698    | Ovol1      | 0.480728    |
| Hpse2      | 0.292939    | LOC500124  | 0.365675    | Fam25a     | 0.409643    | Dnaja1    | 0.450781    | Slc30a2    | 0.481019    |
| Wfdc1      | 0.298137    | Car7       | 0.366033    | LOC500118  | 0.410107    | Abcc12    | 0.452929    | Myk3       | 0.481424    |
| Gng13      | 0.298455    | Ces1e      | 0.366485    | Ppp1r1b    | 0.411777    | Gsta5     | 0.453848    | Gramd1b    | 0.483214    |
| RGD1564894 | 0.299079    | Gdf10      | 0.367301    | Abcb1a     | 0.4132      | Mybl1     | 0.455184    | Fmo4       | 0.484039    |
| Usp26      | 0.300605    | Ust5r      | 0.367829    | Samd5      | 0.414308    | Aadac     | 0.4552      | Blvra      | 0.484172    |
| Upp2       | 0.30077     | Rxfp2      | 0.368765    | Ace2       | 0.414368    | Fhit      | 0.455517    | Dleu7      | 0.484746    |
| Cyp2d2     | 0.302451    | Gas2       | 0.369514    | Esr1       | 0.414508    | Hsp90aa1  | 0.456362    | Hhip       | 0.484827    |
| Ggct       | 0.302515    | Cml5       | 0.369638    | Dpp6       | 0.414761    | Col9a2    | 0.459542    | Grhpr      | 0.485332    |
| Cpxm2      | 0.303244    | Tmod4      | 0.371923    | Grid1      | 0.41623     | Slc22a25  | 0.459913    | Neto2      | 0.486228    |
| Ggct       | 0.303377    | Necab2     | 0.37293     | Scn1b      | 0.41738     | Entpd8    | 0.460173    | Acad10     | 0.488349    |
| Klk1l      | 0.305362    | Irf7       | 0.373841    | Slc6a13    | 0.417588    | Klk1      | 0.46028     | Mettl7b    | 0.488562    |
| Tmprss8    | 0.307162    | Prom1      | 0.374003    | Tmem88b    | 0.417737    | Gss       | 0.460693    | Slc22a6    | 0.488636    |
| Slc22a2    | 0.307412    | Id4        | 0.374072    | Sult2b1    | 0.41953     | Akr1b10   | 0.46099     | Hsd3b      | 0.488842    |
| Aspg       | 0.308428    | Klk1c10    | 0.374443    | Serpinf2   | 0.419818    | Slc1a4    | 0.461058    | Wwp1       | 0.490696    |
| Sdsl       | 0.309177    | Mat2a      | 0.374584    | Cml1       | 0.422075    | Tmlhe     | 0.461475    | Slc35d1    | 0.491796    |
| Acot12     | 0.314729    | Cyp2d4     | 0.377437    | Cndp1      | 0.422421    | Phf19     | 0.461765    | Akr1c19    | 0.492316    |
| Slco4c1    | 0.316808    | Pkd2l2     | 0.378378    | Ankrd29    | 0.423168    | Hspb1     | 0.463222    | Sult1c2    | 0.493499    |
| Slco1a6    | 0.3181      | Slc39a12   | 0.380762    | LOC685046  | 0.423469    | Acy3      | 0.463225    | Ddo        | 0.493556    |
| Ghrhr      | 0.318147    | Nat8b      | 0.382362    | Irx3       | 0.42428     | Grin2b    | 0.463456    | Slc13a3    | 0.49417     |
| Gclc       | 0.318503    | Abcc8      | 0.382466    | RGD1310262 | 0.424941    | Agt       | 0.464683    | Slc6a18    | 0.494689    |
| F13b       | 0.319365    | RGD1304605 | 0.383296    | Fbxo36     | 0.425079    | Cdh20     | 0.465454    | Acy1       | 0.495713    |
| Piwi2      | 0.320467    | Miox       | 0.383353    | Alpk3      | 0.425319    | Tmem125   | 0.465595    | RGD1308114 | 0.496525    |
| Slc25a25   | 0.322291    | Ntrk1      | 0.38358     | Cpvl       | 0.428308    | Esm1      | 0.46659     | Amacr      | 0.499578    |
| RGD1305733 | 0.322426    | Akr1c1     | 0.383776    | Slii1      | 0.430538    | Clk2      | 0.467427    | Aqp11      | 0.499604    |

| gene      | Fold change | gene       | Fold change | gene         | Fold change | gene     | Fold change | gene       | Fold change |
|-----------|-------------|------------|-------------|--------------|-------------|----------|-------------|------------|-------------|
| Hist1h2ba | 0.500298    | Slc35f2    | 0.525943    | Mpdz         | 0.549535    | Akr7a2   | 0.570597    | Adam1a     | 0.5846      |
| Sema5b    | 0.500462    | Kynu       | 0.527304    | Ahsa2        | 0.549548    | Ddx25    | 0.570718    | Espn       | 0.584879    |
| Abhd14a   | 0.503446    | Pgm3       | 0.52787     | Khk          | 0.549953    | Rasl10b  | 0.570944    | Pdzd3      | 0.584929    |
| Olr1668   | 0.505371    | Slc30a1    | 0.528015    | Ak2          | 0.551558    | Abhd14b  | 0.5711      | Dusp9      | 0.584949    |
| Gstt1     | 0.505427    | Igfbp4     | 0.528067    | Snta1        | 0.553245    | Crot     | 0.571854    | N6amt1     | 0.585597    |
| Ifit3     | 0.50546     | Hsd3b1     | 0.528163    | Ddx58        | 0.553446    | Abhd1    | 0.572693    | Scn8a      | 0.586191    |
| LOC500300 | 0.506503    | Ptprq      | 0.528657    | Chordc1      | 0.553847    | RT1-A3   | 0.57278     | Usp20      | 0.586466    |
| Ahcy      | 0.507068    | Gsta4      | 0.528805    | Zfp354a      | 0.554754    | Tmem33   | 0.573239    | Tpk1       | 0.586706    |
| Neu2      | 0.507121    | Upb1       | 0.529072    | Ddx19b       | 0.555359    | Acadm    | 0.573439    | Mep1a      | 0.587119    |
| Aspa      | 0.507498    | Hgd        | 0.530035    | RT1-A1       | 0.556427    | Dhx58    | 0.573652    | Gamt       | 0.587242    |
| Pld1      | 0.507978    | Ces4a      | 0.5302      | Sod1         | 0.556864    | Hspe1    | 0.574487    | Cacybp     | 0.58725     |
| P4ha1     | 0.509258    | Gjb1       | 0.53044     | Kifc1        | 0.557339    | Mgat3    | 0.574558    | Slc10a5    | 0.587308    |
| Htatip2   | 0.509404    | RGD1309228 | 0.531152    | Ppm1j        | 0.557467    | MsrA     | 0.574623    | Pfkfb4     | 0.588143    |
| Creld2    | 0.509977    | Dak        | 0.531235    | B3galt5      | 0.557858    | Gfra1    | 0.575259    | Ush1c      | 0.588482    |
| Btc       | 0.510037    | Ptpru      | 0.53128     | LOC306766    | 0.558195    | Slc6a4   | 0.575811    | Atp11a     | 0.588493    |
| Hspa5     | 0.510677    | Cth        | 0.532802    | Bhmt2        | 0.559633    | Acox1    | 0.576044    | Glyat      | 0.588557    |
| Mir107    | 0.510886    | Lace1      | 0.533703    | Oxct1        | 0.559799    | Mcoln1   | 0.576904    | RGD1565316 | 0.589162    |
| Ehhadh    | 0.512875    | Cyp2j4     | 0.533897    | Acn9         | 0.560301    | Serpinc1 | 0.577229    | Msrb2      | 0.589943    |
| LOC500947 | 0.513844    | Stat5a     | 0.534077    | Egfl6        | 0.560566    | Mfsd7    | 0.578055    | MGC95152   | 0.589966    |
| Fahd1     | 0.513861    | RGD1564171 | 0.534112    | Tmem205      | 0.560899    | Tfec     | 0.5789      | Slc47a1    | 0.590414    |
| Otog      | 0.513889    | Pamr1      | 0.536559    | lah1         | 0.560955    | Vegfb    | 0.579039    | Ddi2       | 0.591327    |
| Haci1     | 0.514151    | Amn        | 0.536777    | Cdr2         | 0.560988    | Capn6    | 0.579386    | Slc25a15   | 0.592058    |
| Cesl1     | 0.515434    | Sec16b     | 0.536919    | Tmem14a      | 0.561783    | Aplp1    | 0.579544    | Fah        | 0.592397    |
| A1cf      | 0.51567     | St6gal1    | 0.537324    | Slc13a2      | 0.562235    | Rarres1  | 0.579923    | Sgk1       | 0.593414    |
| Col4a4    | 0.515796    | RGD1565997 | 0.537547    | Krt10        | 0.564537    | Zc3h15   | 0.58072     | Pxmp2      | 0.595395    |
| Hbxip     | 0.515868    | Slc22a18   | 0.540348    | Epb4114b     | 0.564739    | Hnf4g    | 0.580827    | Slc5a11    | 0.595587    |
| Ces1f     | 0.517095    | Haa0       | 0.540679    | LOC100125368 | 0.565139    | Ftcd     | 0.580985    | RGD1310686 | 0.596082    |
| Rimbp2    | 0.517116    | Entpd5     | 0.54116     | LOC500797    | 0.565226    | Dao      | 0.581656    | Mlycd      | 0.596136    |
| Slc23a3   | 0.518615    | Tmem174    | 0.541414    | Semp8        | 0.565354    | Mocs2    | 0.581728    | Stip1      | 0.59638     |
| Tmod1     | 0.519471    | Car5b      | 0.541492    | Nl5e         | 0.566193    | Ncbp1    | 0.582478    | Thrb       | 0.596603    |
| Cib2      | 0.519725    | Akap6      | 0.542008    | LOC498662    | 0.566659    | Xprnep2  | 0.582513    | Cisd1      | 0.597252    |
| Agmat     | 0.519855    | Olfml1     | 0.543175    | Mx1          | 0.566721    | Slc25a38 | 0.582896    | Nudt12     | 0.597907    |
| Ugt2b7    | 0.520774    | Tmc3       | 0.543209    | Hnf4a        | 0.566865    | Scand1   | 0.583002    | Oxnad1     | 0.598087    |
| Ces2h     | 0.520809    | Ddx19a     | 0.543284    | Tinag        | 0.567199    | Gp2      | 0.583043    | Phyhd1     | 0.598287    |
| Rnls      | 0.520854    | Nit1       | 0.544963    | Pank1        | 0.567826    | Ccdc113  | 0.583161    | Fam86a     | 0.59897     |
| Tpmt      | 0.522171    | Tecta      | 0.54615     | Slc22a1      | 0.569232    | Agphd1   | 0.58352     | Macrod1    | 0.599353    |
| Dpys      | 0.523709    | Ttc36      | 0.547242    | Etv5         | 0.569258    | Cmb1     | 0.583787    | Dpp4       | 0.59961     |
| Mpp6      | 0.523954    | Dnajb2     | 0.547685    | Jag1         | 0.569495    | Oxct1    | 0.584423    | Fbxo9      | 0.599643    |
| Eci3      | 0.524879    | Tyw1       | 0.548473    | Hspa8        | 0.569687    | Sgca     | 0.584476    | Cldn6      | 0.599653    |
| LOC686288 | 0.525368    | Eaf2       | 0.549268    | Erc2         | 0.570196    | Cat      | 0.584551    | Thns12     | 0.599701    |

**SIGNIFICANTLY UPREGULATED IN DS (VS LS)  
TO MORE THAN 1.4 FOLD**

| gene   | Fold change | gene  | Fold change | gene   | Fold change | gene   | Fold change | gene   | Fold change |
|--------|-------------|-------|-------------|--------|-------------|--------|-------------|--------|-------------|
| Mmp8   | 43.93308    | Il24  | 19.00611    | Alox15 | 11.54505    | Ccl22  | 9.739922    | Cd300a | 8.125758    |
| S100a8 | 25.04238    | A2m   | 16.11324    | Pdcd1  | 11.49666    | Rgs7bp | 9.271599    | Lppr5  | 8.111593    |
| Kcnf1  | 23.17831    | Trem2 | 14.72908    | Nmb    | 11.16625    | Nkain3 | 8.74272     | Olah   | 7.812908    |
| Chi3l1 | 19.09019    | Sell  | 13.55383    | Cenpt  | 10.50532    | Mir503 | 8.255178    | Rgs14  | 7.812429    |



| gene       | Fold change | gene      | Fold change | gene      | Fold change | gene       | Fold change | gene         | Fold change |
|------------|-------------|-----------|-------------|-----------|-------------|------------|-------------|--------------|-------------|
| Gipc3      | 7.676574    | Hfe2      | 4.187472    | Ddx4      | 3.120009    | Slc2a6     | 2.659347    | Hk3          | 2.358363    |
| Fgb        | 7.597658    | Ypel4     | 4.152697    | Ephb6     | 3.115367    | Dlgap5     | 2.635152    | Unc5a        | 2.355246    |
| LOC24906   | 7.334892    | Sh2d2a    | 4.151598    | Ms4a6b    | 3.103923    | Bnpl       | 2.63353     | Plek         | 2.354175    |
| Lef1       | 7.313626    | Pthlh     | 4.081139    | Clstn2    | 3.101141    | Uhrf1      | 2.629338    | Gria2        | 2.351948    |
| Hist1h2ak  | 7.002566    | Mir20a    | 4.068282    | Actn2     | 3.098324    | Cd72       | 2.622141    | Sphkap       | 2.340265    |
| Nrtn       | 6.869658    | Espl1     | 3.981033    | Kng1      | 3.083033    | Mastl      | 2.621819    | Dscr6        | 2.33773     |
| Selp       | 6.805054    | Socs3     | 3.963792    | LOC287167 | 3.024358    | Caps2      | 2.620671    | RGD1308694   | 2.327125    |
| Nxph3      | 6.719151    | Clec10a   | 3.881922    | Ptpn7     | 3.01269     | LOC685157  | 2.62031     | Kcnd1        | 2.326659    |
| Hemgn      | 6.652276    | Cthrc1    | 3.832343    | Rab26     | 3.012462    | Hjurp      | 2.619422    | Kif22        | 2.313728    |
| Ntsr1      | 6.601076    | B4galnt4  | 3.820941    | Bco2      | 2.994384    | Pkp1       | 2.617233    | Slc16a3      | 2.309212    |
| Vom2r13    | 6.550116    | Tcp11     | 3.7884      | Eapa2     | 2.988256    | Tifa       | 2.610553    | Cdca7        | 2.308496    |
| Pemt       | 6.469662    | Csdc2     | 3.778104    | Serpina1  | 2.949925    | Plcb2      | 2.600615    | Cdc6         | 2.307764    |
| LOC685099  | 6.404196    | Dynlrb2   | 3.763635    | Slc14a1   | 2.941771    | LOC685157  | 2.595878    | Stra6        | 2.295861    |
| Tnni2      | 6.092615    | Myom2     | 3.755606    | Glpr1     | 2.939479    | Fam109b    | 2.593488    | Alox12       | 2.292537    |
| Oaz3       | 5.896277    | Ubd       | 3.689323    | Gpr85     | 2.930222    | Cdkn2b     | 2.588571    | Cd38         | 2.28712     |
| Btn1a1     | 5.721839    | Cdt1      | 3.677842    | Ccl21     | 2.918611    | Mcm5       | 2.585056    | Arid5a       | 2.286968    |
| Il8rb      | 5.717403    | Grap2     | 3.638443    | Mfi2      | 2.915675    | Pbk        | 2.575077    | Sdc1         | 2.271959    |
| Grik2      | 5.699233    | Ptprv     | 3.632387    | Fam131b   | 2.911264    | Clstn2     | 2.57351     | LOC681325    | 2.269584    |
| Sele       | 5.622896    | Mapk15    | 3.60445     | Baat      | 2.909345    | Tlr10      | 2.572425    | Arhgap30     | 2.268045    |
| Sstr3      | 5.594951    | Vstm2b    | 3.582525    | Rasgrp4   | 2.90149     | Rap2b      | 2.562509    | Samsn1       | 2.266847    |
| RT1-M4     | 5.594345    | Rtn4rl2   | 3.581329    | Ccl19     | 2.889413    | Rnd1       | 2.5538      | Ccdc102a     | 2.263929    |
| Ckap2      | 5.50241     | Rcor2     | 3.57973     | Nfkbi2    | 2.889303    | Gabrp      | 2.551722    | Baalc        | 2.263575    |
| Cacna2d2   | 5.363767    | Fcrls     | 3.565434    | Adora3    | 2.888162    | RGD1308226 | 2.548609    | Drd1a        | 2.260594    |
| Cfi        | 5.351354    | Alox5     | 3.565155    | Vtcn1     | 2.887933    | Dnm1       | 2.540308    | Art3         | 2.252937    |
| Olr300     | 5.314626    | Scara5    | 3.562654    | Nptx2     | 2.874695    | Kif23      | 2.511369    | Mcm3         | 2.252866    |
| Mmp12      | 5.28525     | Cxcl13    | 3.553129    | Iqgap3    | 2.872704    | Cxcr4      | 2.508893    | Znf483       | 2.251045    |
| Crygs      | 5.251649    | Adra1d    | 3.549049    | Gucy2e    | 2.871479    | Batf       | 2.502266    | Alas2        | 2.248094    |
| Alox15b    | 5.251395    | Cdca3     | 3.535106    | Ndc80     | 2.870256    | Mmp20      | 2.500891    | Lrat         | 2.247984    |
| Nuf2       | 5.250156    | Trim50    | 3.484763    | LOC691141 | 2.865801    | Cks2       | 2.496205    | Tgm3         | 2.24214     |
| Havcr1     | 5.222698    | Traf4af1  | 3.47302     | Il12a     | 2.847062    | Kntc1      | 2.493051    | Pipox        | 2.23545     |
| Hp         | 5.19563     | Tnni2     | 3.447887    | Capn13    | 2.834131    | Il7r       | 2.490853    | RT1-Da       | 2.234107    |
| Epha5      | 5.115273    | Tmem40    | 3.390573    | Cd3g      | 2.82981     | Lrrc33     | 2.473685    | Il18r1       | 2.23392     |
| Cyp1b1     | 5.07027     | Camkv     | 3.385512    | Cacnb1    | 2.828575    | Folr2      | 2.467879    | Clec12a      | 2.229886    |
| Nsg2       | 5.057271    | Creb3l3   | 3.369737    | RT1-Ba    | 2.825522    | Trip13     | 2.453992    | Cdc25c       | 2.224183    |
| Kng2       | 4.907208    | Cdkn1a    | 3.333154    | Vash2     | 2.82131     | Ilgb4      | 2.436567    | LOC100158225 | 2.221755    |
| Cd80       | 4.886726    | Kif2c     | 3.309761    | Cxcl10    | 2.811954    | Cysl1r1    | 2.433561    | Ankrd39      | 2.205462    |
| Slc9a5     | 4.730785    | Adamts4   | 3.308472    | Syt12     | 2.797952    | Gstm1      | 2.428028    | Ebf4         | 2.194701    |
| Trpv6      | 4.704221    | Abca15    | 3.308005    | Chrn2     | 2.795105    | Glrx1      | 2.42737     | Fam111a      | 2.18701     |
| Nepn       | 4.667734    | LOC690352 | 3.29897     | Syt7      | 2.782046    | Clec5a     | 2.426816    | Mcm6         | 2.185611    |
| Fam46b     | 4.641355    | St8sia4   | 3.296983    | Msr1      | 2.779346    | Lag3       | 2.422957    | Lrrc36       | 2.184494    |
| Serpina3n  | 4.51049     | Fam101a   | 3.293025    | Casc5     | 2.779177    | Csf1r      | 2.417278    | Lgals3       | 2.181677    |
| Cass4      | 4.504281    | Dpep2     | 3.284913    | RT1-Bb    | 2.769831    | RGD1562284 | 2.413622    | Igfbp1       | 2.176853    |
| RGD1563235 | 4.477809    | Rhbdl2    | 3.276615    | Cd300a    | 2.765351    | Fkbp10     | 2.413152    | Arhgap9      | 2.175871    |
| Spp1       | 4.46431     | Tmem195   | 3.252187    | Top2a     | 2.739692    | Ccdc19     | 2.410692    | Il18bp       | 2.170236    |
| Pcdh21     | 4.43749     | Lsl1      | 3.243737    | Cd53      | 2.733375    | Cd36       | 2.403465    | C1qtnf1      | 2.168833    |
| Fgg        | 4.412922    | Tlr11     | 3.234496    | Ndr4      | 2.723393    | Clecsf6    | 2.401717    | Clp3         | 2.164536    |
| RGD1559482 | 4.39915     | Odz4      | 3.210104    | Lrg1      | 2.702059    | Tifab      | 2.399378    | Birc3        | 2.16281     |
| Dmc1       | 4.360309    | Angptl3   | 3.201036    | Snx20     | 2.698769    | Tlr5       | 2.387306    | Arl11        | 2.16279     |
| Pou3f4     | 4.326839    | Gas7      | 3.183419    | Slc10a2   | 2.69508     | Cd37       | 2.385215    | Lox          | 2.160509    |
| Fcer2      | 4.27601     | Spag5     | 3.162525    | Cps1      | 2.690816    | LOC302022  | 2.380506    | Ciita        | 2.15129     |
| Fcnb       | 4.272006    | Kng1l1    | 3.129814    | Kcnab2    | 2.675152    | Ptprcap    | 2.365221    | Lrsam1       | 2.144006    |
| Tekt4      | 4.214316    | Clec7a    | 3.122328    | Dsn1      | 2.665797    | Tubb6      | 2.360803    | Il2rg        | 2.136408    |

| gene       | Fold change | gene       | Fold change | gene       | Fold change | gene      | Fold change | gene       | Fold change |
|------------|-------------|------------|-------------|------------|-------------|-----------|-------------|------------|-------------|
| Cd44       | 2.135244    | Il7        | 1.9673      | Hmox1      | 1.835917    | Cd226     | 1.726367    | Plekhg2    | 1.657745    |
| Clec4a3    | 2.131873    | Rasgrp1    | 1.960304    | Ptprc      | 1.835589    | Cxcl11    | 1.725372    | RT1-DOa    | 1.657146    |
| Mpeg1      | 2.125235    | Ceacam20   | 1.956036    | Fn1        | 1.833285    | Angptl4   | 1.724958    | Trim16     | 1.656977    |
| RGD1565355 | 2.123451    | Pi16       | 1.954238    | Steap4     | 1.83305     | Rarres2   | 1.722889    | Apobec1    | 1.656282    |
| LOC360504  | 2.123048    | Retnlq     | 1.95135     | Col16a1    | 1.824776    | Alox5ap   | 1.722795    | Nrp2       | 1.65589     |
| RGD1560691 | 2.122307    | Myo1f      | 1.951186    | MGC112715  | 1.823275    | Dpysl3    | 1.719548    | Rbm3       | 1.655504    |
| RT1-Db1    | 2.114811    | C2         | 1.950883    | Endou      | 1.816576    | Entpd3    | 1.714545    | LOC689296  | 1.653818    |
| Hist1h2ail | 2.103091    | Fcer1g     | 1.950674    | Nfkbie     | 1.811271    | Pvrl2     | 1.712927    | Rftn1      | 1.651842    |
| Rad51      | 2.103075    | Irf1       | 1.950637    | Klhl6      | 1.807667    | Pstpip1   | 1.712575    | Elmo1      | 1.650938    |
| Tmem176a   | 2.101354    | Tacc3      | 1.945174    | Lgals1     | 1.805487    | Cpt1b     | 1.711129    | Scel       | 1.650549    |
| Pdlim1     | 2.10053     | Tmprss9    | 1.942297    | Btk        | 1.803632    | Dkk2      | 1.711045    | Dapp1      | 1.648994    |
| Pla2g7     | 2.099529    | Fcgr1a     | 1.941157    | Pole2      | 1.803525    | Fry       | 1.710212    | Tlr1       | 1.647889    |
| C4-2       | 2.097423    | Gpx2       | 1.940601    | Ccdc69     | 1.801386    | Gpr183    | 1.708867    | Hmgb2      | 1.647727    |
| C1qtnf6    | 2.09711     | Ucp2       | 1.937022    | Upp1       | 1.801375    | LOC689064 | 1.704902    | Fga        | 1.647608    |
| Zmynd12    | 2.093949    | RT1-DMa    | 1.933418    | Pde1b      | 1.798443    | Nrm       | 1.704865    | Sema3f     | 1.647082    |
| Tlr7       | 2.083125    | Apcs       | 1.931639    | Mmp14      | 1.795759    | Aurkc     | 1.704       | Itga5      | 1.646951    |
| Hba-a2     | 2.07853     | Irf5       | 1.930369    | Abcg1      | 1.792223    | Dusp4     | 1.703469    | Arhgap15   | 1.646755    |
| Gli1       | 2.077418    | Pla1a      | 1.92273     | Bmp15      | 1.791843    | Prkcb     | 1.703453    | Egln3      | 1.644901    |
| Brca2      | 2.076226    | Rrm2       | 1.920958    | Car13      | 1.789183    | F5        | 1.702009    | Galnt13    | 1.643635    |
| Tmem136    | 2.069644    | Gngt2      | 1.917395    | Tmem176b   | 1.788973    | Hmha1     | 1.700297    | Rab27a     | 1.643477    |
| Hmga1      | 2.068407    | Prim1      | 1.916778    | Mrgprx3    | 1.785976    | Cdkn1c    | 1.699582    | RGD1566112 | 1.642875    |
| Eif4ebp1   | 2.058122    | Icam1      | 1.915398    | Il20ra     | 1.785197    | Prc1      | 1.699406    | Ch25h      | 1.642283    |
| Arhgap11a  | 2.048553    | A3galt2    | 1.913628    | Col3a1     | 1.783378    | Cd34      | 1.697889    | Gstm7      | 1.641028    |
| Hrg        | 2.044261    | Gdap1      | 1.90957     | Ezh2       | 1.779177    | Mctp2     | 1.697867    | Gda        | 1.637776    |
| Mybl2      | 2.037574    | RGD1309522 | 1.908619    | Slc4a7     | 1.778675    | Phlda3    | 1.692086    | Ncam1      | 1.636684    |
| Laptm5     | 2.030418    | Des        | 1.90845     | Map4k1     | 1.773177    | Sema7a    | 1.690478    | Tbxas1     | 1.636151    |
| Synpo2     | 2.027072    | Lipe       | 1.906147    | Trpv5      | 1.771284    | P2ry6     | 1.689685    | Fam113b    | 1.634026    |
| RGD1562342 | 2.026142    | Lsp1       | 1.903189    | Klrl1      | 1.770679    | Cadm4     | 1.689613    | Dse        | 1.634014    |
| Pagr8      | 2.023874    | Wisp1      | 1.901335    | Cmklr1     | 1.769748    | Stat4     | 1.68801     | Wdr25l     | 1.63384     |
| Irf8       | 2.023345    | Fbln1      | 1.899906    | Marcks1    | 1.767899    | Foxm1     | 1.687663    | Thbs2      | 1.632565    |
| C3ar1      | 2.017882    | Syn3       | 1.897936    | Dcl1       | 1.76776     | Galr2     | 1.686574    | Smtnl2     | 1.630869    |
| Nlrp3      | 2.013887    | Cp         | 1.896473    | Rhbdf2     | 1.76366     | Scara3    | 1.686542    | Pcdha9     | 1.629583    |
| Lypd1      | 2.01164     | Pik3cd     | 1.894367    | Elk3       | 1.763219    | Arpc1b    | 1.686084    | Ttc9       | 1.629198    |
| Clec4a1    | 2.011314    | C4b        | 1.893634    | Arnt2      | 1.762078    | Adcy7     | 1.685535    | Dkk3       | 1.628606    |
| Slamf8     | 2.011141    | Ankrd13d   | 1.891027    | Pdpm       | 1.761789    | Epha7     | 1.684551    | Arhgap25   | 1.628564    |
| Cd4        | 2.01031     | Cd93       | 1.889594    | Col1a1     | 1.761568    | Cpne8     | 1.68395     | Casp4      | 1.62588     |
| RGD1564927 | 2.008119    | C1s        | 1.888758    | Ap1s2      | 1.760341    | Pla2g4a   | 1.682904    | Calb1      | 1.625453    |
| Mir126     | 2.005098    | Fam129a    | 1.888414    | Arb2       | 1.75729     | Sec14l2   | 1.681699    | Racgap1    | 1.619794    |
| Tpx2       | 2.004211    | Lcp1       | 1.882417    | Hist1h1a   | 1.756206    | Gpr19     | 1.681599    | Sult1a1    | 1.617431    |
| Gldc       | 2.00196     | Rap2ip     | 1.881758    | Mcoln3     | 1.7558      | Plekhn1   | 1.681186    | Pcdha11    | 1.617349    |
| Caskin1    | 1.99585     | Donson     | 1.881259    | Ppl        | 1.755259    | Slc25a24  | 1.680094    | Abr        | 1.616784    |
| Nckap1l    | 1.995124    | Card9      | 1.87787     | MGC105567  | 1.752713    | Apol3     | 1.676809    | Prex1      | 1.616726    |
| Prr11      | 1.993787    | Pask       | 1.876323    | Gm2a       | 1.750521    | Tmem86b   | 1.67643     | Siva1      | 1.61562     |
| Sfrp2      | 1.989911    | C4-2       | 1.875274    | Cdca2      | 1.747768    | Ephb3     | 1.675449    | Map3k8     | 1.614598    |
| Pld4       | 1.986262    | Cspg4      | 1.875123    | Ccr9       | 1.746451    | Plekho1   | 1.671701    | Zfp385a    | 1.614571    |
| Osmr       | 1.985496    | Apoe       | 1.863691    | Pik3ip1    | 1.74254     | Pcdha1    | 1.67106     | Ifitm1     | 1.610348    |
| Cd28       | 1.985469    | Ydjc       | 1.85836     | Limd2      | 1.741804    | Timeless  | 1.670403    | Prcp       | 1.610265    |
| Ctrl       | 1.982219    | Vim        | 1.855717    | M1a        | 1.740687    | Ccnb1     | 1.670153    | Sass6      | 1.610225    |
| Sash3      | 1.981442    | Tmem146    | 1.853712    | Antr1      | 1.739303    | Rxrg      | 1.66971     | Il1rl1     | 1.609161    |
| Evi2a      | 1.980235    | Fam105a    | 1.851741    | Endog      | 1.739156    | Steap1    | 1.669518    | Pappa      | 1.608332    |
| Polq       | 1.979706    | Hist1h1b   | 1.848688    | Txnrd3     | 1.737741    | Pcdhac1   | 1.666372    | Rin1       | 1.606986    |
| Sla        | 1.978304    | Wdr62      | 1.845476    | Ednra      | 1.735749    | Hebp2     | 1.664123    | Slc37a2    | 1.606151    |
| RGD1564776 | 1.974118    | Olfm1      | 1.844057    | Tiam1      | 1.735736    | Il6r      | 1.66381     | Aldh1a2    | 1.605946    |
| Klra2      | 1.973578    | Syk        | 1.842566    | Nap1l5     | 1.732964    | Ugcg      | 1.661306    | Tmem20     | 1.605931    |
| LOC688090  | 1.9733      | Pik3r5     | 1.842274    | Map1a      | 1.732548    | Thsd1     | 1.660682    | Scin       | 1.605343    |
| Cenpf      | 1.969306    | Vav1       | 1.841498    | Cnp        | 1.730575    | lsg20     | 1.659286    | Fetub      | 1.605306    |
| Cd276      | 1.967847    | Slc10a1    | 1.839857    | RGD1566001 | 1.72652     | Dcdc2     | 1.658793    | Dom3z      | 1.605291    |

| gene       | Fold change |
|------------|-------------|------------|-------------|------------|-------------|------------|-------------|------------|-------------|
| MGC108823  | 1.604596    | Lpin2      | 1.551719    | Nid67      | 1.502653    | Ankrd6     | 1.463418    | Sat1       | 1.421998    |
| Slc6a9     | 1.603522    | Adams7     | 1.551126    | C1r        | 1.502631    | Myct1      | 1.462506    | Olfml3     | 1.421394    |
| Axl        | 1.600965    | Cyp2e1     | 1.548805    | Klf6       | 1.501726    | Nlrp1a     | 1.46197     | Tank       | 1.421354    |
| Sirpa      | 1.599843    | Pcdhb20    | 1.546328    | Gmpr       | 1.50164     | RGD1312026 | 1.459831    | Tgjf1      | 1.420541    |
| Pcdhac2    | 1.596669    | Pcdha7     | 1.546098    | Slc8a1     | 1.501181    | Ptk7       | 1.459791    | Plscr3     | 1.419919    |
| Pcdha2     | 1.595099    | Pid1       | 1.545734    | Sv2a       | 1.500699    | Fblim1     | 1.459498    | Gls        | 1.419112    |
| Sh2d3c     | 1.593717    | Bmp1       | 1.544271    | Chsy1      | 1.500576    | Kcnma1     | 1.45873     | Pcdha4     | 1.417512    |
| S100a11    | 1.593604    | Ksr1       | 1.540606    | Snn        | 1.500082    | Odz3       | 1.458612    | Heyl       | 1.416928    |
| Mirlet7b   | 1.592844    | Rab8b      | 1.537645    | Map1b      | 1.499763    | Btg1       | 1.457099    | Ttc39b     | 1.415568    |
| Nrarp      | 1.592619    | Gabra1     | 1.537633    | Cpz        | 1.49821     | Nckipsd    | 1.456478    | Hexdc      | 1.414615    |
| Pcdha10    | 1.591173    | Foxp1      | 1.536864    | Zfp358     | 1.496745    | Wdhd1      | 1.455963    | Gusb       | 1.413588    |
| Sema4c     | 1.590767    | Pde4b      | 1.534951    | Ddx59      | 1.496393    | Homer3     | 1.455367    | Ccl28      | 1.412979    |
| Irak3      | 1.589304    | Osbp17     | 1.534472    | Brpf3      | 1.495897    | Runx2      | 1.454508    | Slc44a2    | 1.412962    |
| Galns      | 1.588943    | Hhex       | 1.53407     | Mcam       | 1.495173    | Notch3     | 1.454257    | Zfp57      | 1.412727    |
| Apln       | 1.586827    | Ttk        | 1.531052    | Trpm3      | 1.493372    | Pde10a     | 1.453908    | St6galnac2 | 1.412471    |
| Olfml2b    | 1.586398    | Sparc      | 1.530907    | Nme4       | 1.492514    | Camk2d     | 1.453622    | Lrrc32     | 1.412126    |
| Gab2       | 1.585205    | Csf1       | 1.529536    | Zc3h6      | 1.492436    | Cxcl16     | 1.452723    | Cd1d1      | 1.411566    |
| Ptp4a3     | 1.585193    | Dock11     | 1.5285      | Rbp1       | 1.490053    | Mobkl2a    | 1.451509    | Sh3kbp1    | 1.411277    |
| Ifngr2     | 1.583456    | Ssfa2      | 1.528284    | Ticam2     | 1.489923    | Synpo      | 1.450835    | Hspa12b    | 1.410346    |
| Septin6    | 1.579413    | Calr3      | 1.528283    | Slc43a3    | 1.489571    | Geft       | 1.449617    | Slc1a5     | 1.41033     |
| Acer2      | 1.579323    | Slc25a22   | 1.527626    | Cyp4a8     | 1.489259    | LOC500684  | 1.448662    | St6galnac2 | 1.409998    |
| Pcdha6     | 1.578676    | Pddc1      | 1.527462    | Pcdha12    | 1.488486    | Prickle2   | 1.447211    | Lrrc32     | 1.40989     |
| Ifitm3     | 1.578062    | Elf3       | 1.52709     | Il17rc     | 1.488126    | Mdm1       | 1.446944    | Cd1d1      | 1.409735    |
| Aacs       | 1.57711     | Pik3ap1    | 1.525347    | Lpxn       | 1.487598    | Flot2      | 1.445897    | Sh3kbp1    | 1.407299    |
| Mpp2       | 1.57525     | RGD1563888 | 1.524064    | Mir761     | 1.487041    | Ccng1      | 1.442654    | Hspa12b    | 1.407147    |
| Cmtm3      | 1.575054    | Aph1b      | 1.523489    | Inpp5d     | 1.486822    | Lrch1      | 1.442282    | Slc1a5     | 1.406956    |
| Mybpc2     | 1.574584    | Apaf1      | 1.521828    | Mt2A       | 1.486261    | S1pr2      | 1.442273    | Ankrd44    | 1.409998    |
| Pcdha5     | 1.574362    | Fchsdl     | 1.519913    | Plk2       | 1.486108    | Foxk1      | 1.440712    | Arhgap4    | 1.40989     |
| Lbp        | 1.573847    | Prkg1      | 1.519824    | Vdr        | 1.479352    | Tubb5      | 1.439898    | Rbl1       | 1.409735    |
| Mtmr7      | 1.573649    | Nek11      | 1.519253    | Sec14l1    | 1.478696    | Ppap2a     | 1.437451    | Rab31      | 1.407299    |
| RGD1311946 | 1.572324    | Ets1       | 1.519213    | Col5a2     | 1.477228    | Fyb        | 1.436601    | Stxbp1     | 1.407147    |
| Pcdha8     | 1.567258    | Adams15    | 1.516503    | Fhl2       | 1.477035    | Nos3       | 1.434777    | Lmbr1l     | 1.406956    |
| Kif3c      | 1.566336    | Abcb10     | 1.516138    | Serpini1   | 1.47554     | Fam102b    | 1.434356    | Cep97      | 1.406434    |
| Pcdha3     | 1.565623    | Tes        | 1.515564    | Rbpj       | 1.475524    | Tmem229a   | 1.433576    | Mtp        | 1.405936    |
| Tnfrsf1a   | 1.562655    | Ly86       | 1.515155    | Phf13      | 1.47506     | Esyt1      | 1.433403    | Akna       | 1.40401     |
| Lgals3bp   | 1.562216    | Cdc25b     | 1.514272    | RT1-N1     | 1.474802    | Adck5      | 1.43321     | Dram       | 1.403577    |
| Bicd1      | 1.559872    | Bmp6       | 1.514014    | P2ry14     | 1.474341    | Kirrel     | 1.431929    | Ssh2       | 1.402932    |
| Anxa3      | 1.558164    | Fbn1       | 1.513666    | Heph       | 1.474252    | Csgalnact1 | 1.431821    | Nufip1     | 1.402177    |
| Nes        | 1.55806     | RGD1309543 | 1.51269     | RGD1305939 | 1.47392     | Xdh        | 1.431494    |            |             |
| Inpp4a     | 1.5573      | Olr59      | 1.512146    | Adcy4      | 1.473674    | Arpc1b     | 1.431196    |            |             |
| Pla2r1     | 1.556973    | Ctsd       | 1.511509    | Nod1       | 1.472826    | RGD1309829 | 1.430237    |            |             |
| Praf2      | 1.556366    | Dynl1      | 1.511262    | Abi3       | 1.472815    | Arhgef2    | 1.430068    |            |             |
| RT1-DMb    | 1.556361    | Cyth4      | 1.510807    | Ranbp17    | 1.472321    | Plp2       | 1.427761    |            |             |
| Ier3       | 1.556242    | Ctsl1      | 1.510716    | RGD1305455 | 1.470449    | Plce1      | 1.426062    |            |             |
| Bard1      | 1.555675    | Neurl2     | 1.510091    | Zbed3      | 1.46981     | RGD1559896 | 1.425055    |            |             |
| Tgfb1      | 1.555474    | Rhog       | 1.509143    | Palb2      | 1.469114    | Gcnt2      | 1.425018    |            |             |
| Jak3       | 1.55488     | Zfp385b    | 1.508747    | Rgma       | 1.468463    | Pcdha13    | 1.424698    |            |             |
| Bex2       | 1.554049    | Abhd4      | 1.508034    | Rasgrf2    | 1.467461    | Lmf2       | 1.424212    |            |             |
| Rem2       | 1.553863    | RT1-N2     | 1.505094    | Crispld1   | 1.466218    | Tbc1d10c   | 1.423763    |            |             |
| Pmf1       | 1.552746    | Cirbp      | 1.503479    | Cd40       | 1.464801    | Stk10      | 1.422904    |            |             |
| Cldn17     | 1.551814    | Cd97       | 1.503264    | Gatsl2     | 1.464038    | F2r        | 1.422692    |            |             |

**SIGNIFICANTLY DOWNREGULATED IN DS (VS LS)  
(TO LESS THAN 0.6 FOLD)**

| gene         | Fold change | gene       | Fold change | gene       | Fold change | gene       | Fold change | gene       | Fold change |
|--------------|-------------|------------|-------------|------------|-------------|------------|-------------|------------|-------------|
| Kcnk16       | 0           | Slc35f1    | 0.243322    | Cyp4a3     | 0.377089    | Tnfrsf11b  | 0.444303    | RGD1309228 | 0.499384    |
| Dscaml1      | 0           | Cldn6      | 0.243948    | Wfdc1      | 0.378405    | Cyp2d2     | 0.445728    | Pou3f1     | 0.50059     |
| Cyp8b1       | 0.010404    | Slit1      | 0.244026    | Fam189b    | 0.379207    | Ccrn4l     | 0.448763    | Slc1a4     | 0.501043    |
| Serpnb12     | 0.032785    | Slc7a13    | 0.244506    | Cyp2d1     | 0.380777    | Tex15      | 0.44949     | Trank1     | 0.501446    |
| Olr1326      | 0.043199    | Tm4sf20    | 0.248756    | Reep1      | 0.385661    | RGD1560271 | 0.452351    | Gcgr       | 0.501451    |
| LOC361914    | 0.043873    | Hnmt       | 0.249722    | Gcm1       | 0.387992    | Cpxm2      | 0.452669    | Pamr1      | 0.501574    |
| RT1.aa       | 0.056014    | Cacna1h    | 0.25326     | Aspg       | 0.389406    | RT1-T24-3  | 0.452909    | Hspa8      | 0.502128    |
| Slc7a12      | 0.057054    | Klrc2      | 0.253261    | RGD1310324 | 0.39055     | LOC500124  | 0.459669    | Rxfp2      | 0.503857    |
| Wisp3        | 0.057839    | Ky         | 0.254511    | Bst2       | 0.390827    | Bai1       | 0.460784    | Ccdc68     | 0.504483    |
| RT1-EC2      | 0.058369    | Ppia4      | 0.263639    | Prlr       | 0.392659    | Lactb2     | 0.46087     | Galnt14    | 0.505198    |
| Anxa13       | 0.058496    | Cyp2d3     | 0.269578    | Anpep      | 0.392937    | Cilp       | 0.461958    | Dio1       | 0.506002    |
| Cfr          | 0.064463    | RGD1565166 | 0.271257    | Akr1c12l1  | 0.393318    | Enpp3      | 0.462017    | Ppp1r1b    | 0.506147    |
| Olr1331      | 0.082209    | Mrap       | 0.275683    | Hist1h2an  | 0.394406    | Mir107     | 0.462826    | Scn1b      | 0.507495    |
| Hsd3b6       | 0.084442    | Ppic       | 0.280371    | Ugt2b37    | 0.394474    | Ptprq      | 0.465102    | Slc25a30   | 0.507904    |
| LOC680734    | 0.087826    | Ifit1      | 0.280461    | Coch       | 0.395368    | Slc3a1     | 0.465282    | Dleu7      | 0.50843     |
| Aldh1b1      | 0.089869    | Gpr63      | 0.281793    | RGD1564937 | 0.395886    | RGD1304644 | 0.466806    | Jag1       | 0.509667    |
| Cyp2c11      | 0.097067    | Kcna5      | 0.282584    | Iqch       | 0.396256    | LOC367975  | 0.467174    | Odc1       | 0.510193    |
| Nalcn        | 0.098954    | Fam25a     | 0.286978    | Ggct       | 0.397914    | Ntrk1      | 0.468433    | Lcn2       | 0.510523    |
| Ly49l5       | 0.100577    | Nhlh2      | 0.287366    | Ggct       | 0.397968    | Ces4a      | 0.46815     | Tmprss8    | 0.512059    |
| Frmf3        | 0.105197    | Snap91     | 0.290012    | Gucy1b2    | 0.398151    | Fhit       | 0.469133    | Apom       | 0.514332    |
| Slco1a1      | 0.109584    | RT1-M6-2   | 0.290546    | RGD1564865 | 0.398586    | Mcoln2     | 0.469191    | Tmod4      | 0.514761    |
| Atp1a4       | 0.116811    | Tnmd       | 0.292486    | Hsph1      | 0.401467    | Piwi2      | 0.470122    | Oat        | 0.515205    |
| Defb42       | 0.122531    | RGD1564894 | 0.301254    | Rwdd2a     | 0.402891    | Mogat2     | 0.470512    | P4ha1      | 0.518204    |
| Gapdh-ps1    | 0.127648    | Afm        | 0.301703    | Sox12      | 0.403542    | Nat8b      | 0.471021    | lhh        | 0.51821     |
| Snca         | 0.127808    | Cyp2d5     | 0.30224     | Cml2       | 0.406242    | Phf19      | 0.472045    | Clrn3      | 0.519422    |
| Chrna7       | 0.130154    | Mapk10     | 0.307092    | Irx3       | 0.406604    | Slc22a2    | 0.472593    | Tmem14a    | 0.519749    |
| Slc22a13     | 0.131375    | Areg       | 0.30963     | Basp1      | 0.406964    | Proc       | 0.473054    | Igfbp4     | 0.519811    |
| Sptlc3       | 0.136495    | Cacng5     | 0.310683    | Akr1c13    | 0.407283    | Fam43a     | 0.473919    | Dnaj4      | 0.519824    |
| Cabp7        | 0.156491    | Sds        | 0.311274    | Hsp90aa1   | 0.407683    | Mirlet7d   | 0.474471    | Mlc1       | 0.52235     |
| Acox2        | 0.159295    | Dhrs7      | 0.311925    | Samd5      | 0.408239    | RT1-A1     | 0.474926    | Prom1      | 0.523849    |
| RGD1563714   | 0.160977    | Gdf10      | 0.31221     | LOC360919  | 0.408629    | Klk1       | 0.475331    | Tmlhe      | 0.524682    |
| Gjd2         | 0.163225    | Asrgl1     | 0.316743    | Me1        | 0.410357    | Prrt1      | 0.475794    | Slc23a1    | 0.525061    |
| Slc22a7      | 0.166739    | Kap        | 0.323999    | Grpr       | 0.410611    | Cyp2d4     | 0.478395    | Gclm       | 0.525459    |
| Gc           | 0.167269    | Ldhd       | 0.324365    | Clec2l     | 0.415345    | Trpc5      | 0.479436    | Pld1       | 0.525998    |
| Hormad2      | 0.171534    | Cryab      | 0.325902    | Akr1c12    | 0.415525    | Cdo1       | 0.479703    | Dnaj1      | 0.526188    |
| Klk1b21      | 0.179584    | Hist1h2ba  | 0.328046    | Klk1l      | 0.41657     | Exd1       | 0.479799    | UST4r      | 0.527894    |
| Hrasls       | 0.184919    | Hsd17b1    | 0.335184    | Pecr       | 0.419894    | Hao2       | 0.481522    | Abcb1a     | 0.527909    |
| Wnt2b        | 0.188246    | Chrna2     | 0.339105    | Cpvl       | 0.423932    | Chit1      | 0.483497    | Klk1c10    | 0.529346    |
| Tal2         | 0.191181    | Casq1      | 0.340394    | LOC56764   | 0.424619    | Elf1       | 0.486077    | Hist2h4    | 0.529525    |
| LOC100359649 | 0.192266    | Nefh       | 0.34143     | Alpk3      | 0.424885    | Lipg       | 0.487952    | Rnls       | 0.530285    |
| Gtbbp4       | 0.196668    | Dio2       | 0.341454    | Gclc       | 0.428948    | RT1-A3     | 0.488751    | Ghr        | 0.532489    |
| RGD1562658   | 0.202351    | Cdh7       | 0.350776    | Gng13      | 0.429074    | Upp2       | 0.488835    | Ust5r      | 0.533726    |
| Rgn          | 0.204247    | Slco1a5    | 0.352573    | Melk       | 0.429751    | Klk1b3     | 0.489079    | Csad       | 0.534318    |
| Foxn4        | 0.214762    | Cyp4a2     | 0.355897    | Nefm       | 0.429831    | Fmo3       | 0.491528    | Umod       | 0.535229    |
| Derl3        | 0.21785     | A2bp1      | 0.359351    | RGD1561849 | 0.430215    | Lrrn1      | 0.491639    | Serpinf2   | 0.535872    |
| Tff3         | 0.222108    | Cldn9      | 0.360418    | RGD1304605 | 0.432254    | Mat2a      | 0.492334    | LOC494499  | 0.536032    |
| Gabbr1       | 0.224507    | RGD1562673 | 0.362098    | Prep       | 0.432466    | Sult2a1    | 0.492609    | Rdh7       | 0.53643     |
| Mir326       | 0.224507    | Slc16a4    | 0.365359    | Sl8sia1    | 0.432605    | Hpse2      | 0.493905    | Slc22a12   | 0.536675    |
| RGD1304731   | 0.225856    | Hspb1      | 0.366383    | Slc22a9    | 0.436825    | Trim69     | 0.494572    | Fam86a     | 0.543746    |
| Akr1b8       | 0.229812    | Ccdc114    | 0.371464    | Afaf       | 0.438146    | Ace2       | 0.49509     | N6am1      | 0.543963    |
| Prph         | 0.230468    | Mir872     | 0.371559    | Col17a1    | 0.441611    | Khdrbs3    | 0.49621     | Slc15a2    | 0.544272    |
| Akr1c14      | 0.236659    | Gpat2      | 0.371716    | Asqr1      | 0.442502    | Egf        | 0.496439    | Hspa5      | 0.545018    |
| Col9a1       | 0.236774    | Reep6      | 0.372838    | Ggh        | 0.443166    | RT1-S2     | 0.497965    | Apoh       | 0.545066    |
| Usp29        | 0.243063    | Cyp4a2     | 0.375867    | Osgin1     | 0.444057    | Slco1a6    | 0.498727    | Hagh       | 0.547197    |

| gene     | Fold change | gene      | Fold change | gene      | Fold change | gene      | Fold change | gene     | Fold change |
|----------|-------------|-----------|-------------|-----------|-------------|-----------|-------------|----------|-------------|
| RT1-Db2  | 0.547457    | LOC501038 | 0.559285    | Id4       | 0.570942    | Nlrp6     | 0.58049     | Agmat    | 0.592284    |
| Cyp2j3   | 0.547619    | Mybl1     | 0.560403    | Abca4     | 0.571177    | Nat8      | 0.582208    | Stom     | 0.593091    |
| Stip1    | 0.548452    | Aimp2     | 0.560775    | Creld2    | 0.571239    | Gss       | 0.584111    | Fam188a  | 0.593389    |
| F13b     | 0.548554    | Slc5a9    | 0.563327    | Slco4c1   | 0.572883    | Mbl1      | 0.584844    | Mpdz     | 0.593962    |
| Cml1     | 0.548716    | Pip5k1b   | 0.563984    | LOC685046 | 0.575121    | Acpp      | 0.585908    | Slc39a8  | 0.594176    |
| Zfp93    | 0.554007    | Clk2      | 0.564566    | Pklr      | 0.577369    | Tnxa      | 0.586243    | Fahd1    | 0.595348    |
| Slc21a4  | 0.554478    | Cyp2j4    | 0.565243    | Car5b     | 0.577893    | Smtn      | 0.58778     | Cyca     | 0.595941    |
| Akr7a3   | 0.555053    | LOC690349 | 0.568184    | LOC498662 | 0.5789      | LOC366431 | 0.587976    | Serpinh1 | 0.597286    |
| Dpp6     | 0.555151    | Pgm3      | 0.56825     | Chordc1   | 0.579063    | Fez2      | 0.588076    | lyd      | 0.59847     |
| Efna5    | 0.558943    | Cyp2s1    | 0.569327    | Gsg1      | 0.579163    | Snx7      | 0.590933    |          |             |
| Hsp90ab1 | 0.559111    | Gstt1     | 0.570776    | Slc23a3   | 0.579267    | Tyw1      | 0.592242    |          |             |

## SIGNIFICANTLY UPREGULATED IN DI VS DS MORE THAN 1.4 FOLD

| gene       | Fold change | gene           | Fold change | gene       | Fold change | gene       | Fold change | gene         | Fold change |
|------------|-------------|----------------|-------------|------------|-------------|------------|-------------|--------------|-------------|
| Reg3b      | 14.00783    | Pcdhb2         | 2.76513     | Ms4a14     | 2.230637    | Cldn4      | 1.94061     | Ccnjl        | 1.77404     |
| Muc15      | 9.134586    | Inhba          | 2.722993    | Dcaf12l1   | 2.227596    | Fanca      | 1.916633    | Tgfb2        | 1.76416     |
| Gsdmc      | 7.173087    | Rprm           | 2.70625     | Tpbq       | 2.221717    | RGD1308165 | 1.915541    | RGD1563666   | 1.758316    |
| Mia        | 5.970006    | Olr1584        | 2.69936     | LOC56764   | 2.220345    | Flnc       | 1.89806     | Arhgap20     | 1.747754    |
| Aqp5       | 5.970006    | Asf1b          | 2.692153    | Duoxa1     | 2.214169    | Syt9       | 1.896493    | C1qtnf5      | 1.745433    |
| Arntl2     | 5.924969    | P2ry12         | 2.662157    | Col3a1     | 2.212086    | Hcrt1      | 1.894965    | Adcy7        | 1.744318    |
| RGD1306230 | 5.404514    | Clspn          | 2.652355    | Vwa5b2     | 2.210533    | Ccdc68     | 1.88856     | Fbn1         | 1.742959    |
| RGD1310376 | 5.213922    | Col1a1         | 2.557509    | Ccna2      | 2.207597    | Olr1       | 1.886409    | Slc25a24     | 1.742165    |
| Mcpt8      | 4.90796     | Ska3           | 2.547626    | Fcrls      | 2.205446    | Cd44       | 1.885988    | Marcksl1     | 1.739775    |
| Atg9b      | 4.897775    | Serpina10      | 2.528346    | Reep1      | 2.198309    | Pik3r5     | 1.885687    | Gpr63        | 1.73263     |
| Msc        | 4.471258    | Mir423         | 2.52658     | Ubd        | 2.197356    | Smoc2      | 1.88554     | Sdk2         | 1.730718    |
| Il24       | 4.374881    | C4bpb          | 2.502385    | Lrat       | 2.196456    | Cd276      | 1.881265    | Ccdc69       | 1.729565    |
| Dok6       | 4.069499    | Mcpt8l2        | 2.501401    | Asam       | 2.193396    | Gabrp      | 1.866887    | Col8a1       | 1.727552    |
| Chrna7     | 3.973508    | RGD1565734pred | 2.473425    | Tmem119    | 2.178935    | Kcnp3      | 1.855081    | Cdk1         | 1.725816    |
| Aurkb      | 3.948361    | Gins1          | 2.468704    | Irf4       | 2.162978    | Gja1       | 1.850082    | Adora2b      | 1.725196    |
| RGD1564114 | 3.943595    | Cdc42ep5       | 2.467112    | Cttna2     | 2.156079    | Il17re     | 1.841887    | Slc25a27     | 1.723465    |
| Dsg3       | 3.813897    | Shisa4         | 2.450483    | Shc2       | 2.135523    | Abcb1b     | 1.840812    | C2           | 1.721383    |
| RGD1561145 | 3.799894    | Hist1h1b       | 2.447469    | Tmsb10     | 2.128491    | Loxl2      | 1.834631    | Ces1a        | 1.720394    |
| Mmp16      | 3.795097    | Sult1c3        | 2.432194    | Raet1l     | 2.112149    | Sc65       | 1.832019    | LOC100188933 | 1.719583    |
| Cd40lg     | 3.683392    | Epdr1          | 2.415408    | Ubash3a    | 2.112093    | Car13      | 1.830343    | Dcl1         | 1.711389    |
| Scgb3a2    | 3.682673    | Scn5a          | 2.414483    | RGD1309077 | 2.100547    | Bub1       | 1.828488    | Snai1        | 1.709349    |
| Bcmo1      | 3.612729    | Hrasls         | 2.411296    | Trim36     | 2.05927     | Nr5a2      | 1.823283    | S100a10      | 1.698088    |
| Ramp1      | 3.573622    | Adcy2          | 2.407514    | Tek1       | 2.039246    | Syn1       | 1.822864    | Loxl1        | 1.697911    |
| Tram1l1    | 3.461197    | Batf           | 2.402187    | Cdkn2b     | 2.02399     | Ltbp2      | 1.822256    | Col5a2       | 1.69574     |
| Trim69     | 3.260195    | Tppp3          | 2.384561    | Mmp2       | 2.021196    | C1qtnf6    | 1.820313    | Gna15        | 1.690544    |
| Hist1h2an  | 3.25425     | Nrm            | 2.360603    | Prtfcd1    | 2.013701    | Col1a2     | 1.819516    | Mex3b        | 1.690034    |
| Prr16      | 3.194748    | Ppp2r2c        | 2.353346    | Hpgd       | 2.00805     | Adcyap1r1  | 1.818935    | Hist1h2bn    | 1.685763    |
| Acox1      | 3.170323    | Odz4           | 2.335303    | Sctr       | 2.003887    | Rtn2       | 1.817025    | Tbxas1       | 1.685654    |
| Serinc4    | 3.139574    | Mybl2          | 2.316069    | Clec10a    | 1.99748     | Serpine2   | 1.816244    | Dpysl3       | 1.685086    |
| Chrc1      | 3.122919    | Cacna1h        | 2.302301    | LOC500413  | 1.991497    | Parvg      | 1.815613    | Opn3         | 1.680435    |
| Capns2     | 3.118799    | Cdca7          | 2.300534    | Rikn2      | 1.97763     | Syt5       | 1.807853    | Cd6          | 1.676271    |
| Scn9a      | 3.108581    | Pldc1          | 2.295906    | Dsc2       | 1.969156    | Baalc      | 1.8061      | Aldh18a1     | 1.671839    |
| Tbx21      | 3.018548    | Mfap4          | 2.286849    | Cfi        | 1.965527    | Pcdhb10    | 1.797933    | Vim          | 1.670117    |
| Mdga1      | 2.929776    | Adamts2        | 2.273729    | Mycn       | 1.95539     | Fignl1     | 1.792444    | Psmb8        | 1.665815    |
| Rhbdl2     | 2.855112    | Ptprz1         | 2.263465    | Osm        | 1.952256    | Fn1        | 1.785888    | Anxa2        | 1.664904    |
| Chac1      | 2.851985    | Fam70b         | 2.237076    | Olfm4      | 1.951222    | MGC116202  | 1.778191    | Casp4        | 1.66397     |

| gene       | Fold change | gene      | Fold change | gene     | Fold change | gene       | Fold change | gene      | Fold change |
|------------|-------------|-----------|-------------|----------|-------------|------------|-------------|-----------|-------------|
| Adamts7    | 1.662178    | Selplg    | 1.585338    | Pstpip1  | 1.525835    | Rgs19      | 1.48354     | Mrpl23    | 1.427401    |
| Ccdc114    | 1.659701    | Tmem40    | 1.585286    | Tax1bp3  | 1.524234    | Hist2h4    | 1.48088     | Ebpl      | 1.423504    |
| Anxa1      | 1.656805    | Mical2    | 1.579016    | Tmsb4x   | 1.524195    | Anxa7      | 1.480398    | Vegfc     | 1.421563    |
| Casc5      | 1.656649    | Adamts5   | 1.578793    | E2f1     | 1.522694    | Rpp21      | 1.478815    | Prkar2b   | 1.42065     |
| Ccdc80     | 1.650906    | Ier5      | 1.576163    | Slc46a1  | 1.521943    | Ddx41      | 1.477254    | Mrc2      | 1.417676    |
| RGD1563982 | 1.650338    | LOC679651 | 1.575639    | Cdh11    | 1.521578    | Emp3       | 1.475791    | Apol3     | 1.41622     |
| Cnrip1     | 1.649052    | Lfn4      | 1.573548    | Igfbp6   | 1.520344    | Ano1       | 1.472436    | Chst14    | 1.415052    |
| Trerf1     | 1.647657    | Hsd3b7    | 1.572269    | Grem1    | 1.519722    | Tappl      | 1.467191    | LOC683626 | 1.414856    |
| RGD1560455 | 1.646697    | Efemp2    | 1.569197    | Cacnb3   | 1.51914     | LOC685171  | 1.461207    | Ng35      | 1.413942    |
| Pcdh18     | 1.644343    | Rcn1      | 1.56588     | Ptprs    | 1.515544    | Sorcs2     | 1.459804    | Cald1     | 1.411021    |
| Fam111a    | 1.641278    | Tsga14    | 1.558706    | Fat3     | 1.514652    | Tap2       | 1.458679    | Efna1     | 1.410172    |
| Adamts12   | 1.63828     | Rad54b    | 1.558701    | Tnfrsf1b | 1.513113    | Hells      | 1.456797    | Unc119    | 1.406632    |
| Pqhc3      | 1.634499    | Tmem176a  | 1.556822    | Srxn1    | 1.513102    | Lgals3bp   | 1.456445    | Nxn       | 1.405513    |
| LOC310926  | 1.633918    | Il1rl1    | 1.556122    | Gata6    | 1.512781    | Pdlim7     | 1.454491    | Cdh6      | 1.402727    |
| Gli3       | 1.628737    | Slc10a2   | 1.549806    | Dlgap5   | 1.511469    | Myof       | 1.452823    | Tmtc2     | 1.402689    |
| Reep6      | 1.625867    | Anxa5     | 1.547702    | Adamts15 | 1.509159    | Slc7a2     | 1.452606    | Prcp      | 1.402361    |
| Gmn        | 1.624924    | Arl11     | 1.547425    | Trip13   | 1.508598    | Fam131b    | 1.451913    | Slc9a7    | 1.401513    |
| Gpr153     | 1.624459    | Mir3542   | 1.544849    | Cacna2d1 | 1.506565    | Tpst1      | 1.45058     | Clic1     | 1.401101    |
| Fhl3       | 1.621999    | Trim66    | 1.542378    | Mobkl2a  | 1.506487    | Nid67      | 1.449504    | Pcgf1     | 1.400841    |
| Il7        | 1.621644    | Arpp21    | 1.540465    | Ccr5     | 1.505142    | RGD1311892 | 1.447021    | Fut4      | 1.400541    |
| Cnp        | 1.621635    | Fxyd5     | 1.539921    | Nelf     | 1.501989    | Colec12    | 1.445297    |           |             |
| Col5a1     | 1.612684    | Tes       | 1.535461    | Adora1   | 1.50185     | Arpc1b     | 1.445051    |           |             |
| Cxadr      | 1.611973    | Nipsnap3b | 1.535424    | Bmp1     | 1.501799    | Srd5a3     | 1.444652    |           |             |
| Lgals3     | 1.611854    | Septin 6  | 1.534148    | Cfh      | 1.49886     | Itpr3      | 1.438687    |           |             |
| Col4a1     | 1.610927    | Lhpl2     | 1.533116    | C1qc     | 1.496872    | Pld4       | 1.435377    |           |             |
| Plekha4    | 1.603267    | Msr1      | 1.531874    | Paqr4    | 1.496768    | Emd        | 1.435153    |           |             |
| Clec11a    | 1.601878    | Mcm3      | 1.527342    | Arrdc4   | 1.496605    | Itga1      | 1.43469     |           |             |
| Col6a3     | 1.59613     | LOC361346 | 1.526685    | Adam23   | 1.496166    | Fermt1     | 1.428496    |           |             |
| Col6a2     | 1.590044    | Tagln2    | 1.52589     | Gucy1a3  | 1.492998    | Bag2       | 1.428415    |           |             |

## SIGNIFICANTLY DOWNREGULATED IN DI vs DS (TO LESS THAN 0.6 FOLD)

| gene       | Fold change | gene       | Fold change | gene       | Fold change | gene    | Fold change | gene       | Fold change |
|------------|-------------|------------|-------------|------------|-------------|---------|-------------|------------|-------------|
| Stmn3      | 0           | RGD1563263 | 0.342099    | Akr1c1     | 0.492078    | Agbl4   | 0.545162    | Kcnn3      | 0.576536    |
| Gpr120     | 0           | Trim63     | 0.367334    | Corin      | 0.494563    | Ddc     | 0.545311    | LOC499279  | 0.580142    |
| Ntsr1      | 0.069454    | Pla2g10    | 0.367581    | Akr1c18    | 0.50909     | Azgp1   | 0.545722    | Pde1b      | 0.580414    |
| Vom2r49    | 0.081319    | Bmp15      | 0.385802    | LOC360504  | 0.515948    | Gcgr    | 0.550556    | Gjb2       | 0.582848    |
| RGD1562492 | 0.081938    | Acot12     | 0.393951    | Gsta5      | 0.516173    | Olr63   | 0.550627    | B3galt2    | 0.583321    |
| Cpa4       | 0.156248    | Drd1a      | 0.40247     | Slc2a4     | 0.51904     | Ddo     | 0.551026    | Exd1       | 0.58351     |
| Rpe65      | 0.166497    | Cntnap4    | 0.408821    | LOC684993  | 0.520745    | Cct6b   | 0.551806    | Adcy1      | 0.583652    |
| Ppef2      | 0.181164    | Gltpd2     | 0.414217    | Prkg2      | 0.52469     | Tmem86b | 0.55282     | Spink1     | 0.587419    |
| Cuzd1      | 0.185558    | Osap       | 0.4299      | Il20ra     | 0.527093    | Mttp    | 0.554073    | RGD1565316 | 0.588653    |
| Pex5l      | 0.212748    | Mx2        | 0.431908    | RGD1304731 | 0.527628    | Sult5a1 | 0.554492    | Mir336     | 0.589653    |
| Fibcd1     | 0.217445    | Cntn2      | 0.444103    | Hba-a2     | 0.527895    | Btn1a1  | 0.554584    | Smoc1      | 0.589884    |
| Ptpn5      | 0.222902    | Rbp4       | 0.447974    | Mir761     | 0.528565    | Aurkc   | 0.5549      | Sema5b     | 0.591719    |
| Mir20a     | 0.227925    | Scg2       | 0.4508      | Zmynd12    | 0.529457    | Dio1    | 0.56039     | Akr1b10    | 0.59195     |
| LOC690352  | 0.259562    | Hrg        | 0.455497    | Ugt2b36    | 0.530882    | Cd28    | 0.561755    | Raly1      | 0.593328    |
| Matn1      | 0.282244    | Tmem88b    | 0.47185     | Ilh        | 0.532521    | Entpd8  | 0.561926    | Slc6a4     | 0.594376    |
| Rgs7bp     | 0.28409     | Gsta3      | 0.473993    | Egf        | 0.533075    | Abhd14a | 0.566488    | Isq15      | 0.595985    |
| Mylpf      | 0.29371     | Tlr12      | 0.485295    | Shbg       | 0.540888    | Adra1a  | 0.571457    |            |             |
| Gnat1      | 0.319993    | Npx1       | 0.48617     | Stc1       | 0.542808    | Spp2    | 0.572033    |            |             |
| Chrne      | 0.327442    | Dusp15     | 0.487032    | Park2      | 0.544502    | Abca17  | 0.575419    |            |             |
